# Supplementary material for: Theory-Informed Interventions to Improve the Quality of Tuberculosis Evaluation at Ugandan Health Centers: A Quasi-Experimental Study
Source: PLoS One. 2015 Jul 14;10(7):e0132573. doi: 10.1371/journal.pone.0132573 (PMC4501843; doi:10.1371/journal.pone.0132573)
Supplement: S1 Dataset — (XLS) [file pone.0132573.s001.xls]

## Sheet: PLoS One Dataset - Performance 
siteid	date	sex	age	coughhistory	summary	tbexamordered	tbexamcompl	newtbrx	afbpos	post	startdt	startmonth	month	cm
11	2010-02-15	0	30	1	0	0	0	0	0	0	2010-08-15	19.4408	13.4868	-5.95395
11	2010-02-24	0	77	1	1	1	1	1	1	0	2010-08-15	19.4408	13.7829	-5.65789
11	2010-02-19	1	23	1	1	1	1	0	0	0	2010-08-15	19.4408	13.6184	-5.82237
15	2010-02-22	0	78	1	0	1	0	0	0	0	2010-08-15	19.4408	13.7171	-5.72368
15	2010-02-18	0	42	1	1	1	1	0	0	0	2010-08-15	19.4408	13.5855	-5.85526
15	2010-02-16	9	70	1	1	1	1	0	0	0	2010-08-15	19.4408	13.5197	-5.92105
15	2010-02-15	9	58	1	0	1	0	0	0	0	2010-08-15	19.4408	13.4868	-5.95395
15	2010-02-28	0	37	1	0	1	0	0	0	0	2010-08-15	19.4408	13.9145	-5.52632
15	2010-02-18	0	60	1	1	1	1	0	0	0	2010-08-15	19.4408	13.5855	-5.85526
15	2010-02-17	0	34	1	1	1	1	0	0	0	2010-08-15	19.4408	13.5526	-5.88816
15	2010-02-17	0	54	1	1	1	1	0	0	0	2010-08-15	19.4408	13.5526	-5.88816
11	2010-03-31	0	23	1	0	1	0	0	0	0	2010-08-15	19.4408	14.9342	-4.50658
11	2010-03-29	0	29	1	0	0	0	0	0	0	2010-08-15	19.4408	14.8684	-4.57237
11	2010-03-16	1	31	1	1	1	1	0	0	0	2010-08-15	19.4408	14.4408	-5
11	2010-03-12	1	43	1	1	1	1	1	1	0	2010-08-15	19.4408	14.3092	-5.13158
11	2010-03-31	1	57	1	0	1	0	0	0	0	2010-08-15	19.4408	14.9342	-4.50658
11	2010-03-31	1	17	1	0	1	0	0	0	0	2010-08-15	19.4408	14.9342	-4.50658
11	2010-03-15	1	37	1	0	0	0	0	0	0	2010-08-15	19.4408	14.4079	-5.03289
11	2010-03-31	0	32	1	0	1	0	0	0	0	2010-08-15	19.4408	14.9342	-4.50658
11	2010-03-25	0	75	1	0	1	0	0	0	0	2010-08-15	19.4408	14.7368	-4.70395
11	2010-03-26	1	50	1	1	1	1	0	0	0	2010-08-15	19.4408	14.7697	-4.67105
11	2010-03-19	1	57	1	0	1	0	0	0	0	2010-08-15	19.4408	14.5395	-4.90132
11	2010-03-11	0	37	1	1	1	1	1	1	0	2010-08-15	19.4408	14.2763	-5.16447
11	2010-03-31	1	25	1	0	1	0	0	0	0	2010-08-15	19.4408	14.9342	-4.50658
11	2010-03-31	0	26	1	0	1	0	0	0	0	2010-08-15	19.4408	14.9342	-4.50658
11	2010-03-17	1	70	1	1	1	1	0	0	0	2010-08-15	19.4408	14.4737	-4.96711
11	2010-03-29	0	73	1	0	1	1	0	1	0	2010-08-15	19.4408	14.8684	-4.57237
11	2010-03-31	1	43	1	0	1	0	0	0	0	2010-08-15	19.4408	14.9342	-4.50658
11	2010-03-29	0	75	1	0	0	0	0	0	0	2010-08-15	19.4408	14.8684	-4.57237
11	2010-03-30	0	52	1	0	0	0	0	0	0	2010-08-15	19.4408	14.9013	-4.53947
15	2010-03-23	0	67	1	1	1	1	0	0	0	2010-08-15	19.4408	14.671	-4.76974
15	2010-03-09	1	15	1	1	1	1	0	0	0	2010-08-15	19.4408	14.2105	-5.23026
15	2010-03-29	0	40	1	1	1	1	0	0	0	2010-08-15	19.4408	14.8684	-4.57237
15	2010-03-01	0	50	1	0	1	0	0	0	0	2010-08-15	19.4408	13.9474	-5.49342
15	2010-03-31	0	19	1	1	1	1	0	0	0	2010-08-15	19.4408	14.9342	-4.50658
15	2010-03-25	1	60	1	0	0	0	0	0	0	2010-08-15	19.4408	14.7368	-4.70395
15	2010-03-03	0	17	1	1	1	1	0	0	0	2010-08-15	19.4408	14.0132	-5.42763
15	2010-03-19	1	40	1	1	1	1	0	0	0	2010-08-15	19.4408	14.5395	-4.90132
15	2010-03-29	0	35	1	1	1	1	0	0	0	2010-08-15	19.4408	14.8684	-4.57237
15	2010-03-25	9	50	1	1	1	1	0	0	0	2010-08-15	19.4408	14.7368	-4.70395
15	2010-03-24	9	33	1	1	1	1	0	0	0	2010-08-15	19.4408	14.704	-4.73684
15	2010-03-25	0	38	1	1	1	1	0	0	0	2010-08-15	19.4408	14.7368	-4.70395
15	2010-03-19	0	33	1	1	1	1	0	0	0	2010-08-15	19.4408	14.5395	-4.90132
15	2010-03-23	0	40	1	1	1	1	0	0	0	2010-08-15	19.4408	14.671	-4.76974
15	2010-03-29	1	35	1	1	1	1	0	0	0	2010-08-15	19.4408	14.8684	-4.57237
15	2010-03-25	0	38	1	0	0	0	0	0	0	2010-08-15	19.4408	14.7368	-4.70395
16	2010-03-19	1	30	1	1	1	1	0	0	0	2010-09-15	20.4605	14.5395	-5.92105
16	2010-03-18	1	44	1	1	1	1	0	0	0	2010-09-15	20.4605	14.5066	-5.95395
16	2010-03-18	1	44	1	1	1	1	0	0	0	2010-09-15	20.4605	14.5066	-5.95395
16	2010-03-22	1	45	1	1	1	1	0	0	0	2010-09-15	20.4605	14.6382	-5.82237
16	2010-03-25	1	54	1	1	1	1	0	0	0	2010-09-15	20.4605	14.7368	-5.72368
19	2010-03-25	0	30	1	0	0	0	0	0	0	2010-09-15	20.4605	14.7368	-5.72368
19	2010-03-29	0	16	1	0	0	0	0	0	0	2010-09-15	20.4605	14.8684	-5.59211
19	2010-03-30	0	68	1	0	0	0	0	0	0	2010-09-15	20.4605	14.9013	-5.55921
19	2010-03-30	0	30	1	0	0	0	0	0	0	2010-09-15	20.4605	14.9013	-5.55921
11	2010-04-08	1	22	1	1	1	1	0	0	0	2010-08-15	19.4408	15.1974	-4.24342
11	2010-04-30	0	38	1	0	1	0	0	0	0	2010-08-15	19.4408	15.921	-3.51974
11	2010-04-30	1	37	1	0	0	0	0	0	0	2010-08-15	19.4408	15.921	-3.51974
11	2010-04-30	0	37	1	1	1	1	0	0	0	2010-08-15	19.4408	15.921	-3.51974
11	2010-04-30	1	29	1	1	1	1	0	0	0	2010-08-15	19.4408	15.921	-3.51974
11	2010-04-30	0	46	1	0	1	1	0	1	0	2010-08-15	19.4408	15.921	-3.51974
11	2010-04-27	0	61	1	1	1	1	0	0	0	2010-08-15	19.4408	15.8224	-3.61842
11	2010-04-30	1	30	1	0	0	0	0	0	0	2010-08-15	19.4408	15.921	-3.51974
11	2010-04-30	1	37	1	0	0	0	0	0	0	2010-08-15	19.4408	15.921	-3.51974
11	2010-04-20	1	40	1	1	1	1	0	0	0	2010-08-15	19.4408	15.5921	-3.84869
11	2010-04-13	1	33	1	0	1	1	0	1	0	2010-08-15	19.4408	15.3618	-4.07895
11	2010-04-20	0	54	1	1	1	1	0	0	0	2010-08-15	19.4408	15.5921	-3.84869
11	2010-04-30	0	28	1	0	1	0	0	0	0	2010-08-15	19.4408	15.921	-3.51974
11	2010-04-30	0	49	1	0	1	0	0	0	0	2010-08-15	19.4408	15.921	-3.51974
11	2010-04-30	0	30	1	0	0	0	0	0	0	2010-08-15	19.4408	15.921	-3.51974
11	2010-04-30	1	28	1	1	1	1	0	0	0	2010-08-15	19.4408	15.921	-3.51974
11	2010-04-27	0	25	1	1	1	1	0	0	0	2010-08-15	19.4408	15.8224	-3.61842
11	2010-04-30	1	32	1	0	1	0	0	0	0	2010-08-15	19.4408	15.921	-3.51974
11	2010-04-29	0	35	1	1	1	1	0	0	0	2010-08-15	19.4408	15.8882	-3.55263
11	2010-04-30	0	52	1	0	1	0	0	0	0	2010-08-15	19.4408	15.921	-3.51974
11	2010-04-30	1	54	1	0	1	0	0	0	0	2010-08-15	19.4408	15.921	-3.51974
11	2010-04-22	1	40	1	1	1	1	0	0	0	2010-08-15	19.4408	15.6579	-3.78289
11	2010-04-30	0	55	1	1	1	1	0	0	0	2010-08-15	19.4408	15.921	-3.51974
11	2010-04-20	1	35	1	0	1	0	0	0	0	2010-08-15	19.4408	15.5921	-3.84869
11	2010-04-30	0	35	1	1	1	1	0	0	0	2010-08-15	19.4408	15.921	-3.51974
11	2010-04-01	1	41	1	1	1	1	0	0	0	2010-08-15	19.4408	14.9671	-4.47368
15	2010-04-25	0	50	1	1	1	1	0	0	0	2010-08-15	19.4408	15.7566	-3.68421
15	2010-04-23	0	62	1	0	0	0	0	0	0	2010-08-15	19.4408	15.6908	-3.75
15	2010-04-08	1	38	1	1	1	1	0	0	0	2010-08-15	19.4408	15.1974	-4.24342
15	2010-04-05	0	43	1	1	1	1	0	0	0	2010-08-15	19.4408	15.0987	-4.34211
15	2010-04-27	0	52	1	1	1	1	0	0	0	2010-08-15	19.4408	15.8224	-3.61842
15	2010-04-01	1	51	1	1	1	1	0	0	0	2010-08-15	19.4408	14.9671	-4.47368
15	2010-04-06	0	57	1	1	1	1	0	0	0	2010-08-15	19.4408	15.1316	-4.30921
15	2010-04-09	1	15	1	1	1	1	0	0	0	2010-08-15	19.4408	15.2303	-4.21053
15	2010-04-26	1	15	1	1	1	1	0	0	0	2010-08-15	19.4408	15.7895	-3.65132
15	2010-04-13	1	31	1	1	1	1	0	0	0	2010-08-15	19.4408	15.3618	-4.07895
15	2010-04-12	1	73	1	0	0	0	0	0	0	2010-08-15	19.4408	15.329	-4.11184
16	2010-04-08	0	27	1	1	1	1	1	1	0	2010-09-15	20.4605	15.1974	-5.26316
16	2010-04-08	0	18	1	1	1	1	0	0	0	2010-09-15	20.4605	15.1974	-5.26316
16	2010-04-01	0	35	1	1	1	1	0	0	0	2010-09-15	20.4605	14.9671	-5.49342
16	2010-04-07	1	44	1	0	0	0	0	0	0	2010-09-15	20.4605	15.1645	-5.29605
16	2010-04-01	0	45	1	0	1	0	0	0	0	2010-09-15	20.4605	14.9671	-5.49342
16	2010-04-08	0	65	1	1	1	1	0	0	0	2010-09-15	20.4605	15.1974	-5.26316
16	2010-04-07	0	29	1	0	1	0	0	0	0	2010-09-15	20.4605	15.1645	-5.29605
16	2010-04-08	1	45	1	0	0	0	0	0	0	2010-09-15	20.4605	15.1974	-5.26316
16	2010-04-07	0	69	1	1	1	1	0	0	0	2010-09-15	20.4605	15.1645	-5.29605
16	2010-04-14	0	40	1	0	0	0	0	0	0	2010-09-15	20.4605	15.3947	-5.06579
16	2010-04-07	1	60	1	0	1	0	0	0	0	2010-09-15	20.4605	15.1645	-5.29605
17	2010-04-20	0	51	1	1	1	1	0	0	0	2010-10-15	21.4474	15.5921	-5.85526
17	2010-04-26	0	39	1	1	1	1	0	0	0	2010-10-15	21.4474	15.7895	-5.65789
17	2010-04-30	1	30	1	0	1	0	0	0	0	2010-10-15	21.4474	15.921	-5.52632
17	2010-04-19	1	34	1	1	1	1	0	0	0	2010-10-15	21.4474	15.5592	-5.88816
17	2010-04-20	1	60	1	1	1	1	0	0	0	2010-10-15	21.4474	15.5921	-5.85526
17	2010-04-29	0	30	1	1	1	1	0	0	0	2010-10-15	21.4474	15.8882	-5.55921
17	2010-04-21	1	40	1	1	1	1	0	0	0	2010-10-15	21.4474	15.625	-5.82237
17	2010-04-19	1	29	1	0	0	0	0	0	0	2010-10-15	21.4474	15.5592	-5.88816
17	2010-04-26	0	48	1	1	1	1	0	0	0	2010-10-15	21.4474	15.7895	-5.65789
17	2010-04-19	1	26	1	0	0	0	0	0	0	2010-10-15	21.4474	15.5592	-5.88816
17	2010-04-21	0	35	1	0	0	0	0	0	0	2010-10-15	21.4474	15.625	-5.82237
17	2010-04-19	1	24	1	0	0	0	0	0	0	2010-10-15	21.4474	15.5592	-5.88816
17	2010-04-26	0	45	1	1	1	1	0	0	0	2010-10-15	21.4474	15.7895	-5.65789
17	2010-04-19	0	49	1	1	1	1	0	0	0	2010-10-15	21.4474	15.5592	-5.88816
17	2010-04-26	1	37	1	1	1	1	0	0	0	2010-10-15	21.4474	15.7895	-5.65789
17	2010-04-20	1	47	1	1	1	1	0	0	0	2010-10-15	21.4474	15.5921	-5.85526
17	2010-04-16	1	80	1	1	1	1	0	0	0	2010-10-15	21.4474	15.4605	-5.98684
17	2010-04-16	0	35	1	1	1	1	1	1	0	2010-10-15	21.4474	15.4605	-5.98684
17	2010-04-29	1	25	1	1	1	1	0	0	0	2010-10-15	21.4474	15.8882	-5.55921
17	2010-04-22	1	26	1	1	1	1	0	0	0	2010-10-15	21.4474	15.6579	-5.78947
17	2010-04-20	0	51	1	1	1	1	0	0	0	2010-10-15	21.4474	15.5921	-5.85526
17	2010-04-22	0	19	1	1	1	1	0	0	0	2010-10-15	21.4474	15.6579	-5.78947
17	2010-04-26	1	27	1	1	1	1	0	0	0	2010-10-15	21.4474	15.7895	-5.65789
17	2010-04-26	1	50	1	0	0	0	1	0	0	2010-10-15	21.4474	15.7895	-5.65789
17	2010-04-30	0	59	1	1	1	1	0	0	0	2010-10-15	21.4474	15.921	-5.52632
17	2010-04-22	0	74	1	1	1	1	0	0	0	2010-10-15	21.4474	15.6579	-5.78947
17	2010-04-30	0	65	1	1	1	1	0	0	0	2010-10-15	21.4474	15.921	-5.52632
17	2010-04-16	0	27	1	1	1	1	0	0	0	2010-10-15	21.4474	15.4605	-5.98684
19	2010-04-06	0	78	1	0	0	0	0	0	0	2010-09-15	20.4605	15.1316	-5.32895
19	2010-04-21	1	29	1	1	1	1	0	0	0	2010-09-15	20.4605	15.625	-4.83553
19	2010-04-17	1	38	1	1	1	1	0	0	0	2010-09-15	20.4605	15.4934	-4.96711
19	2010-04-26	0	60	1	0	1	0	0	0	0	2010-09-15	20.4605	15.7895	-4.67105
19	2010-04-07	1	35	1	1	1	1	0	0	0	2010-09-15	20.4605	15.1645	-5.29605
19	2010-04-09	1	37	1	0	1	0	0	0	0	2010-09-15	20.4605	15.2303	-5.23026
19	2010-04-27	1	70	1	0	0	0	0	0	0	2010-09-15	20.4605	15.8224	-4.63816
19	2010-04-06	1	28	1	0	0	0	0	0	0	2010-09-15	20.4605	15.1316	-5.32895
19	2010-04-17	1	30	1	0	0	0	0	0	0	2010-09-15	20.4605	15.4934	-4.96711
19	2010-04-23	0	35	1	0	0	0	0	0	0	2010-09-15	20.4605	15.6908	-4.76974
19	2010-04-13	1	30	1	0	0	0	0	0	0	2010-09-15	20.4605	15.3618	-5.09868
19	2010-04-07	1	68	1	0	1	0	0	0	0	2010-09-15	20.4605	15.1645	-5.29605
19	2010-04-12	0	35	1	0	1	0	0	0	0	2010-09-15	20.4605	15.329	-5.13158
19	2010-04-09	1	37	1	0	0	0	0	0	0	2010-09-15	20.4605	15.2303	-5.23026
19	2010-04-30	1	24	1	1	1	1	0	0	0	2010-09-15	20.4605	15.921	-4.53947
19	2010-04-27	0	45	1	0	1	1	0	1	0	2010-09-15	20.4605	15.8224	-4.63816
19	2010-04-06	0	25	1	0	0	0	0	0	0	2010-09-15	20.4605	15.1316	-5.32895
19	2010-04-15	1	23	1	0	0	0	0	0	0	2010-09-15	20.4605	15.4276	-5.03289
19	2010-04-26	1	32	1	1	1	1	0	0	0	2010-09-15	20.4605	15.7895	-4.67105
19	2010-04-28	1	43	1	1	1	1	0	0	0	2010-09-15	20.4605	15.8553	-4.60526
11	2010-05-21	1	50	1	1	1	1	0	0	0	2010-08-15	19.4408	16.6118	-2.82895
11	2010-05-18	1	20	1	1	1	1	0	0	0	2010-08-15	19.4408	16.5132	-2.92763
11	2010-05-31	0	36	1	0	1	0	0	0	0	2010-08-15	19.4408	16.9408	-2.5
11	2010-05-10	0	72	1	1	1	1	0	0	0	2010-08-15	19.4408	16.25	-3.19079
11	2010-05-31	0	30	1	0	1	0	0	0	0	2010-08-15	19.4408	16.9408	-2.5
11	2010-05-05	0	35	1	1	1	1	0	0	0	2010-08-15	19.4408	16.0855	-3.35527
11	2010-05-04	1	40	1	1	1	1	0	0	0	2010-08-15	19.4408	16.0526	-3.38816
11	2010-05-31	0	32	1	1	1	1	0	0	0	2010-08-15	19.4408	16.9408	-2.5
11	2010-05-03	0	18	1	1	1	1	0	0	0	2010-08-15	19.4408	16.0197	-3.42105
11	2010-05-31	0	70	1	1	1	1	0	0	0	2010-08-15	19.4408	16.9408	-2.5
11	2010-05-18	1	42	1	1	1	1	0	0	0	2010-08-15	19.4408	16.5132	-2.92763
11	2010-05-27	1	29	1	0	1	1	0	1	0	2010-08-15	19.4408	16.8092	-2.63158
11	2010-05-31	1	40	1	0	1	0	0	0	0	2010-08-15	19.4408	16.9408	-2.5
11	2010-05-18	1	60	1	1	1	1	0	0	0	2010-08-15	19.4408	16.5132	-2.92763
11	2010-05-21	0	48	1	1	1	1	0	0	0	2010-08-15	19.4408	16.6118	-2.82895
11	2010-05-31	0	28	1	1	1	1	0	0	0	2010-08-15	19.4408	16.9408	-2.5
11	2010-05-31	1	78	1	0	1	0	0	0	0	2010-08-15	19.4408	16.9408	-2.5
11	2010-05-31	0	37	1	0	1	0	0	0	0	2010-08-15	19.4408	16.9408	-2.5
11	2010-05-31	1	30	1	0	1	0	0	0	0	2010-08-15	19.4408	16.9408	-2.5
11	2010-05-18	1	25	1	0	1	0	0	0	0	2010-08-15	19.4408	16.5132	-2.92763
11	2010-05-18	1	47	1	1	1	1	0	0	0	2010-08-15	19.4408	16.5132	-2.92763
11	2010-05-31	0	23	1	1	1	1	1	1	0	2010-08-15	19.4408	16.9408	-2.5
11	2010-05-31	1	16	1	0	1	0	0	0	0	2010-08-15	19.4408	16.9408	-2.5
11	2010-05-10	0	52	1	1	1	1	1	1	0	2010-08-15	19.4408	16.25	-3.19079
11	2010-05-17	0	23	1	0	1	0	0	0	0	2010-08-15	19.4408	16.4803	-2.96053
11	2010-05-14	1	21	1	1	1	1	0	0	0	2010-08-15	19.4408	16.3816	-3.05921
11	2010-05-14	0	36	1	1	1	1	0	0	0	2010-08-15	19.4408	16.3816	-3.05921
15	2010-05-01	1	25	1	0	0	0	0	0	0	2010-08-15	19.4408	15.954	-3.48684
15	2010-05-26	0	34	1	0	1	0	0	0	0	2010-08-15	19.4408	16.7763	-2.66447
15	2010-05-01	1	33	1	0	0	0	0	0	0	2010-08-15	19.4408	15.954	-3.48684
16	2010-05-14	1	20	1	0	0	0	0	0	0	2010-09-15	20.4605	16.3816	-4.07895
16	2010-05-24	0	16	1	1	1	1	0	0	0	2010-09-15	20.4605	16.7105	-3.75
16	2010-05-21	0	42	1	1	1	1	0	0	0	2010-09-15	20.4605	16.6118	-3.84868
16	2010-05-20	1	70	1	1	1	1	0	0	0	2010-09-15	20.4605	16.5789	-3.88158
16	2010-05-28	0	37	1	0	1	1	0	1	0	2010-09-15	20.4605	16.8421	-3.61842
16	2010-05-28	0	23	1	1	1	1	0	0	0	2010-09-15	20.4605	16.8421	-3.61842
16	2010-05-20	1	70	1	1	1	1	0	0	0	2010-09-15	20.4605	16.5789	-3.88158
16	2010-05-25	0	26	1	1	1	1	1	1	0	2010-09-15	20.4605	16.7434	-3.7171
16	2010-05-10	0	54	1	0	0	0	0	0	0	2010-09-15	20.4605	16.25	-4.21053
16	2010-05-18	0	24	1	0	1	0	0	0	0	2010-09-15	20.4605	16.5132	-3.94737
16	2010-05-27	1	57	1	1	1	1	0	0	0	2010-09-15	20.4605	16.8092	-3.65132
16	2010-05-05	0	30	1	0	0	0	0	0	0	2010-09-15	20.4605	16.0855	-4.375
16	2010-05-20	1	25	1	1	1	1	0	0	0	2010-09-15	20.4605	16.5789	-3.88158
16	2010-05-27	1	60	1	1	1	1	0	0	0	2010-09-15	20.4605	16.8092	-3.65132
16	2010-05-24	1	45	1	0	0	0	0	0	0	2010-09-15	20.4605	16.7105	-3.75
16	2010-05-24	0	22	1	1	1	1	0	0	0	2010-09-15	20.4605	16.7105	-3.75
16	2010-05-21	1	15	1	1	1	1	0	0	0	2010-09-15	20.4605	16.6118	-3.84868
16	2010-05-18	1	27	1	1	1	1	0	0	0	2010-09-15	20.4605	16.5132	-3.94737
16	2010-05-24	0	53	1	1	1	1	1	1	0	2010-09-15	20.4605	16.7105	-3.75
16	2010-05-17	1	37	1	1	1	1	0	0	0	2010-09-15	20.4605	16.4803	-3.98026
16	2010-05-27	0	35	1	1	1	1	0	0	0	2010-09-15	20.4605	16.8092	-3.65132
16	2010-05-27	1	65	1	0	1	0	0	0	0	2010-09-15	20.4605	16.8092	-3.65132
16	2010-05-18	0	39	1	1	1	1	0	0	0	2010-09-15	20.4605	16.5132	-3.94737
16	2010-05-18	1	19	1	1	1	1	0	0	0	2010-09-15	20.4605	16.5132	-3.94737
16	2010-05-19	0	42	1	1	1	1	0	0	0	2010-09-15	20.4605	16.5461	-3.91447
16	2010-05-06	0	51	1	0	0	0	0	0	0	2010-09-15	20.4605	16.1184	-4.3421
16	2010-05-18	0	19	1	1	1	1	0	0	0	2010-09-15	20.4605	16.5132	-3.94737
16	2010-05-20	1	51	1	1	1	1	1	1	0	2010-09-15	20.4605	16.5789	-3.88158
17	2010-05-06	0	53	1	0	1	0	0	0	0	2010-10-15	21.4474	16.1184	-5.32895
17	2010-05-30	0	65	1	1	1	1	0	0	0	2010-10-15	21.4474	16.9079	-4.53947
17	2010-05-31	1	19	1	1	1	1	0	0	0	2010-10-15	21.4474	16.9408	-4.50658
17	2010-05-31	1	45	1	1	1	1	0	0	0	2010-10-15	21.4474	16.9408	-4.50658
17	2010-05-24	1	46	1	0	0	0	0	0	0	2010-10-15	21.4474	16.7105	-4.73684
17	2010-05-21	0	28	1	1	1	1	0	0	0	2010-10-15	21.4474	16.6118	-4.83553
17	2010-05-25	0	56	1	1	1	1	0	0	0	2010-10-15	21.4474	16.7434	-4.70395
17	2010-05-07	1	36	1	1	1	1	0	0	0	2010-10-15	21.4474	16.1513	-5.29605
17	2010-05-27	1	29	1	0	0	0	0	0	0	2010-10-15	21.4474	16.8092	-4.63816
17	2010-05-07	1	35	1	1	1	1	1	1	0	2010-10-15	21.4474	16.1513	-5.29605
17	2010-05-13	1	47	1	1	1	1	0	0	0	2010-10-15	21.4474	16.3487	-5.09868
17	2010-05-04	1	80	1	1	1	1	0	0	0	2010-10-15	21.4474	16.0526	-5.39474
17	2010-05-25	0	55	1	1	1	1	0	0	0	2010-10-15	21.4474	16.7434	-4.70395
17	2010-05-27	0	38	1	1	1	1	0	0	0	2010-10-15	21.4474	16.8092	-4.63816
17	2010-05-24	0	32	1	1	1	1	0	0	0	2010-10-15	21.4474	16.7105	-4.73684
17	2010-05-05	1	20	1	1	1	1	0	0	0	2010-10-15	21.4474	16.0855	-5.36184
17	2010-05-10	1	17	1	0	0	0	0	0	0	2010-10-15	21.4474	16.25	-5.19737
17	2010-05-02	1	50	1	1	1	1	0	0	0	2010-10-15	21.4474	15.9868	-5.46053
17	2010-05-13	1	40	1	1	1	1	0	0	0	2010-10-15	21.4474	16.3487	-5.09868
17	2010-05-18	0	48	1	1	1	1	0	0	0	2010-10-15	21.4474	16.5132	-4.93421
17	2010-05-12	0	53	1	1	1	1	1	1	0	2010-10-15	21.4474	16.3158	-5.13158
17	2010-05-04	0	49	1	1	1	1	0	0	0	2010-10-15	21.4474	16.0526	-5.39474
17	2010-05-25	1	29	1	1	1	1	0	0	0	2010-10-15	21.4474	16.7434	-4.70395
17	2010-05-20	0	62	1	1	1	1	0	0	0	2010-10-15	21.4474	16.5789	-4.86842
17	2010-05-03	0	49	1	1	1	1	0	0	0	2010-10-15	21.4474	16.0197	-5.42763
17	2010-05-03	0	40	1	0	1	0	0	0	0	2010-10-15	21.4474	16.0197	-5.42763
17	2010-05-03	1	30	1	1	1	1	0	0	0	2010-10-15	21.4474	16.0197	-5.42763
17	2010-05-12	0	30	1	1	1	1	0	0	0	2010-10-15	21.4474	16.3158	-5.13158
17	2010-05-04	0	33	1	1	1	1	0	0	0	2010-10-15	21.4474	16.0526	-5.39474
17	2010-05-20	0	28	1	1	1	1	0	0	0	2010-10-15	21.4474	16.5789	-4.86842
17	2010-05-13	1	48	1	1	1	1	0	0	0	2010-10-15	21.4474	16.3487	-5.09868
17	2010-05-26	1	33	1	1	1	1	0	0	0	2010-10-15	21.4474	16.7763	-4.67105
17	2010-05-12	0	41	1	1	1	1	0	0	0	2010-10-15	21.4474	16.3158	-5.13158
17	2010-05-12	0	31	1	1	1	1	0	0	0	2010-10-15	21.4474	16.3158	-5.13158
17	2010-05-17	0	54	1	1	1	1	0	0	0	2010-10-15	21.4474	16.4803	-4.96711
17	2010-05-27	0	39	1	1	1	1	0	0	0	2010-10-15	21.4474	16.8092	-4.63816
17	2010-05-19	1	50	1	1	1	1	0	0	0	2010-10-15	21.4474	16.5461	-4.90132
17	2010-05-26	0	37	1	0	0	0	0	0	0	2010-10-15	21.4474	16.7763	-4.67105
17	2010-05-05	1	65	1	1	1	1	0	0	0	2010-10-15	21.4474	16.0855	-5.36184
17	2010-05-26	1	53	1	1	1	1	0	0	0	2010-10-15	21.4474	16.7763	-4.67105
17	2010-05-27	0	42	1	1	1	1	0	0	0	2010-10-15	21.4474	16.8092	-4.63816
17	2010-05-03	1	80	1	1	1	1	0	0	0	2010-10-15	21.4474	16.0197	-5.42763
19	2010-05-19	1	86	1	0	0	0	0	0	0	2010-09-15	20.4605	16.5461	-3.91447
19	2010-05-06	0	25	1	1	1	1	0	0	0	2010-09-15	20.4605	16.1184	-4.3421
19	2010-05-27	1	65	1	0	0	0	0	0	0	2010-09-15	20.4605	16.8092	-3.65132
19	2010-05-21	0	23	1	0	1	1	0	1	0	2010-09-15	20.4605	16.6118	-3.84868
19	2010-05-11	1	47	1	1	1	1	0	0	0	2010-09-15	20.4605	16.2829	-4.17763
19	2010-05-14	1	65	1	0	0	0	0	0	0	2010-09-15	20.4605	16.3816	-4.07895
19	2010-05-24	0	45	1	0	1	1	0	1	0	2010-09-15	20.4605	16.7105	-3.75
19	2010-05-03	1	50	1	0	0	0	0	0	0	2010-09-15	20.4605	16.0197	-4.44079
19	2010-05-03	1	37	1	1	1	1	0	0	0	2010-09-15	20.4605	16.0197	-4.44079
19	2010-05-25	1	48	1	0	0	0	0	0	0	2010-09-15	20.4605	16.7434	-3.7171
19	2010-05-29	1	45	1	0	0	0	0	0	0	2010-09-15	20.4605	16.875	-3.58553
19	2010-05-31	1	33	1	0	0	0	0	0	0	2010-09-15	20.4605	16.9408	-3.51973
19	2010-05-15	1	38	1	0	0	0	0	0	0	2010-09-15	20.4605	16.4145	-4.04605
19	2010-05-14	1	20	1	0	1	0	0	0	0	2010-09-15	20.4605	16.3816	-4.07895
19	2010-05-21	0	60	1	1	1	1	0	0	0	2010-09-15	20.4605	16.6118	-3.84868
19	2010-05-21	1	52	1	0	1	0	0	0	0	2010-09-15	20.4605	16.6118	-3.84868
19	2010-05-27	0	41	1	0	0	0	0	0	0	2010-09-15	20.4605	16.8092	-3.65132
19	2010-05-20	1	79	1	0	1	0	0	0	0	2010-09-15	20.4605	16.5789	-3.88158
19	2010-05-19	1	37	1	0	0	0	0	0	0	2010-09-15	20.4605	16.5461	-3.91447
19	2010-05-28	1	25	1	0	0	0	0	0	0	2010-09-15	20.4605	16.8421	-3.61842
19	2010-05-06	1	56	1	0	1	0	0	0	0	2010-09-15	20.4605	16.1184	-4.3421
19	2010-05-29	0	35	1	0	0	0	0	0	0	2010-09-15	20.4605	16.875	-3.58553
19	2010-05-11	0	40	1	0	1	0	0	0	0	2010-09-15	20.4605	16.2829	-4.17763
19	2010-05-06	0	56	1	1	1	1	0	0	0	2010-09-15	20.4605	16.1184	-4.3421
19	2010-05-11	0	53	1	0	1	0	0	0	0	2010-09-15	20.4605	16.2829	-4.17763
19	2010-05-03	0	22	1	0	0	0	0	0	0	2010-09-15	20.4605	16.0197	-4.44079
19	2010-05-18	1	18	1	1	1	1	0	0	0	2010-09-15	20.4605	16.5132	-3.94737
19	2010-05-03	1	30	1	0	0	0	0	0	0	2010-09-15	20.4605	16.0197	-4.44079
19	2010-05-20	0	45	1	0	0	0	0	0	0	2010-09-15	20.4605	16.5789	-3.88158
19	2010-05-06	0	70	1	0	1	0	0	0	0	2010-09-15	20.4605	16.1184	-4.3421
19	2010-05-27	1	40	1	0	0	0	0	0	0	2010-09-15	20.4605	16.8092	-3.65132
19	2010-05-26	0	73	1	0	0	0	0	0	0	2010-09-15	20.4605	16.7763	-3.68421
11	2010-06-23	1	55	1	1	1	1	0	0	0	2010-08-15	19.4408	17.6974	-1.74342
11	2010-06-30	0	75	1	1	1	1	0	0	0	2010-08-15	19.4408	17.9276	-1.51316
11	2010-06-30	1	50	1	0	0	0	0	0	0	2010-08-15	19.4408	17.9276	-1.51316
11	2010-06-30	0	23	1	1	1	1	1	1	0	2010-08-15	19.4408	17.9276	-1.51316
11	2010-06-10	1	31	1	0	1	0	0	0	0	2010-08-15	19.4408	17.2697	-2.17105
11	2010-06-16	1	36	1	0	1	0	0	0	0	2010-08-15	19.4408	17.4671	-1.97368
11	2010-06-02	0	47	1	0	1	0	0	0	0	2010-08-15	19.4408	17.0066	-2.43421
11	2010-06-16	0	57	1	0	1	0	0	0	0	2010-08-15	19.4408	17.4671	-1.97368
11	2010-06-30	1	34	1	1	1	1	1	1	0	2010-08-15	19.4408	17.9276	-1.51316
11	2010-06-21	1	16	1	1	1	1	0	0	0	2010-08-15	19.4408	17.6316	-1.80921
11	2010-06-18	0	32	1	0	1	0	0	0	0	2010-08-15	19.4408	17.5329	-1.9079
11	2010-06-30	0	17	1	1	1	1	1	1	0	2010-08-15	19.4408	17.9276	-1.51316
11	2010-06-30	1	30	1	1	1	1	0	0	0	2010-08-15	19.4408	17.9276	-1.51316
11	2010-06-30	0	25	1	1	1	1	0	0	0	2010-08-15	19.4408	17.9276	-1.51316
11	2010-06-24	1	32	1	1	1	1	1	1	0	2010-08-15	19.4408	17.7303	-1.71053
11	2010-06-21	1	41	1	1	1	1	0	0	0	2010-08-15	19.4408	17.6316	-1.80921
11	2010-06-14	0	70	1	0	1	0	0	0	0	2010-08-15	19.4408	17.4013	-2.03947
11	2010-06-16	1	67	1	1	1	1	0	0	0	2010-08-15	19.4408	17.4671	-1.97368
11	2010-06-30	1	28	1	0	1	0	0	0	0	2010-08-15	19.4408	17.9276	-1.51316
11	2010-06-28	0	25	1	1	1	1	1	1	0	2010-08-15	19.4408	17.8618	-1.57895
11	2010-06-30	1	27	1	0	1	0	0	0	0	2010-08-15	19.4408	17.9276	-1.51316
11	2010-06-30	1	42	1	1	1	1	0	0	0	2010-08-15	19.4408	17.9276	-1.51316
11	2010-06-10	0	16	1	0	0	0	0	0	0	2010-08-15	19.4408	17.2697	-2.17105
11	2010-06-30	0	67	1	1	1	1	0	0	0	2010-08-15	19.4408	17.9276	-1.51316
11	2010-06-30	0	26	1	1	1	1	1	1	0	2010-08-15	19.4408	17.9276	-1.51316
11	2010-06-02	0	28	1	0	0	0	0	0	0	2010-08-15	19.4408	17.0066	-2.43421
11	2010-06-11	1	50	1	1	1	1	0	0	0	2010-08-15	19.4408	17.3026	-2.13816
11	2010-06-30	0	73	1	0	1	0	0	0	0	2010-08-15	19.4408	17.9276	-1.51316
11	2010-06-08	1	60	1	1	1	1	0	0	0	2010-08-15	19.4408	17.2039	-2.23684
11	2010-06-30	1	25	1	1	1	1	0	0	0	2010-08-15	19.4408	17.9276	-1.51316
11	2010-06-10	0	36	1	0	0	0	0	0	0	2010-08-15	19.4408	17.2697	-2.17105
11	2010-06-21	1	20	1	0	0	0	0	0	0	2010-08-15	19.4408	17.6316	-1.80921
11	2010-06-14	0	40	1	1	1	1	0	0	0	2010-08-15	19.4408	17.4013	-2.03947
11	2010-06-30	1	41	1	1	1	1	0	0	0	2010-08-15	19.4408	17.9276	-1.51316
11	2010-06-28	0	32	1	1	1	1	0	0	0	2010-08-15	19.4408	17.8618	-1.57895
11	2010-06-07	1	35	1	1	1	1	0	0	0	2010-08-15	19.4408	17.1711	-2.26974
11	2010-06-30	1	35	1	0	1	0	0	0	0	2010-08-15	19.4408	17.9276	-1.51316
11	2010-06-30	0	35	1	1	1	1	0	0	0	2010-08-15	19.4408	17.9276	-1.51316
15	2010-06-30	0	35	1	1	1	1	0	0	0	2010-08-15	19.4408	17.9276	-1.51316
15	2010-06-17	1	60	1	1	1	1	0	0	0	2010-08-15	19.4408	17.5	-1.94079
15	2010-06-28	1	24	1	1	1	1	0	0	0	2010-08-15	19.4408	17.8618	-1.57895
15	2010-06-25	1	28	1	1	1	1	0	0	0	2010-08-15	19.4408	17.7632	-1.67763
15	2010-06-07	0	34	1	1	1	1	1	1	0	2010-08-15	19.4408	17.1711	-2.26974
15	2010-06-28	0	40	1	1	1	1	0	0	0	2010-08-15	19.4408	17.8618	-1.57895
15	2010-06-28	1	50	1	0	0	0	0	0	0	2010-08-15	19.4408	17.8618	-1.57895
15	2010-06-03	1	30	1	1	1	1	0	0	0	2010-08-15	19.4408	17.0395	-2.40132
15	2010-06-11	0	37	1	1	1	1	0	0	0	2010-08-15	19.4408	17.3026	-2.13816
15	2010-06-28	0	54	1	1	1	1	0	0	0	2010-08-15	19.4408	17.8618	-1.57895
15	2010-06-27	0	28	1	1	1	1	0	0	0	2010-08-15	19.4408	17.8289	-1.61184
15	2010-06-29	0	20	1	1	1	1	0	0	0	2010-08-15	19.4408	17.8947	-1.54605
15	2010-06-29	0	40	1	1	1	1	0	0	0	2010-08-15	19.4408	17.8947	-1.54605
15	2010-06-26	0	38	1	1	1	1	0	0	0	2010-08-15	19.4408	17.7961	-1.64474
15	2010-06-23	1	30	1	0	1	0	0	0	0	2010-08-15	19.4408	17.6974	-1.74342
15	2010-06-15	1	40	1	1	1	1	0	0	0	2010-08-15	19.4408	17.4342	-2.00658
15	2010-06-06	1	20	1	0	0	0	0	0	0	2010-08-15	19.4408	17.1382	-2.30263
16	2010-06-30	0	42	1	1	1	1	0	0	0	2010-09-15	20.4605	17.9276	-2.53289
16	2010-06-01	0	42	1	1	1	1	0	0	0	2010-09-15	20.4605	16.9737	-3.48684
16	2010-06-30	0	43	1	1	1	1	0	0	0	2010-09-15	20.4605	17.9276	-2.53289
16	2010-06-30	1	25	1	1	1	1	0	0	0	2010-09-15	20.4605	17.9276	-2.53289
16	2010-06-30	0	49	1	1	1	1	0	0	0	2010-09-15	20.4605	17.9276	-2.53289
16	2010-06-04	1	68	1	1	1	1	0	0	0	2010-09-15	20.4605	17.0724	-3.38816
16	2010-06-30	0	41	1	1	1	1	0	0	0	2010-09-15	20.4605	17.9276	-2.53289
16	2010-06-14	1	32	1	0	0	0	0	0	0	2010-09-15	20.4605	17.4013	-3.05921
16	2010-06-30	0	28	1	1	1	1	0	0	0	2010-09-15	20.4605	17.9276	-2.53289
16	2010-06-17	1	43	1	1	1	1	0	0	0	2010-09-15	20.4605	17.5	-2.96053
16	2010-06-16	0	58	1	0	0	0	0	0	0	2010-09-15	20.4605	17.4671	-2.99342
16	2010-06-30	0	18	1	1	1	1	0	0	0	2010-09-15	20.4605	17.9276	-2.53289
16	2010-06-30	1	20	1	1	1	1	0	0	0	2010-09-15	20.4605	17.9276	-2.53289
16	2010-06-30	0	30	1	1	1	1	0	0	0	2010-09-15	20.4605	17.9276	-2.53289
16	2010-06-30	0	68	1	1	1	1	0	0	0	2010-09-15	20.4605	17.9276	-2.53289
16	2010-06-30	1	30	1	1	1	1	0	0	0	2010-09-15	20.4605	17.9276	-2.53289
16	2010-06-30	0	41	1	1	1	1	0	0	0	2010-09-15	20.4605	17.9276	-2.53289
16	2010-06-07	1	35	1	0	0	0	0	0	0	2010-09-15	20.4605	17.1711	-3.28947
17	2010-06-23	0	51	1	0	0	0	0	0	0	2010-10-15	21.4474	17.6974	-3.75
17	2010-06-30	1	33	1	0	0	0	0	0	0	2010-10-15	21.4474	17.9276	-3.51974
17	2010-06-28	1	25	1	1	1	1	1	1	0	2010-10-15	21.4474	17.8618	-3.58553
17	2010-06-18	0	54	1	0	0	0	0	0	0	2010-10-15	21.4474	17.5329	-3.91447
17	2010-06-28	0	16	1	1	1	1	0	0	0	2010-10-15	21.4474	17.8618	-3.58553
17	2010-06-03	1	36	1	0	0	0	0	0	0	2010-10-15	21.4474	17.0395	-4.40789
17	2010-06-01	1	79	1	1	1	1	0	0	0	2010-10-15	21.4474	16.9737	-4.47368
17	2010-06-24	1	51	1	1	1	1	1	1	0	2010-10-15	21.4474	17.7303	-3.71711
17	2010-06-29	0	26	1	0	0	0	0	0	0	2010-10-15	21.4474	17.8947	-3.55263
17	2010-06-15	1	18	1	1	1	1	0	0	0	2010-10-15	21.4474	17.4342	-4.01316
17	2010-06-14	1	50	1	0	0	0	0	0	0	2010-10-15	21.4474	17.4013	-4.04605
17	2010-06-29	1	29	1	1	1	1	0	0	0	2010-10-15	21.4474	17.8947	-3.55263
17	2010-06-04	0	40	1	1	1	1	0	0	0	2010-10-15	21.4474	17.0724	-4.375
17	2010-06-24	1	47	1	0	0	0	0	0	0	2010-10-15	21.4474	17.7303	-3.71711
17	2010-06-04	0	22	1	1	1	1	0	0	0	2010-10-15	21.4474	17.0724	-4.375
19	2010-06-10	1	24	1	1	1	1	0	0	0	2010-09-15	20.4605	17.2697	-3.19079
19	2010-06-22	1	23	1	1	1	1	0	0	0	2010-09-15	20.4605	17.6645	-2.79605
19	2010-06-11	0	45	1	1	1	1	1	1	0	2010-09-15	20.4605	17.3026	-3.15789
19	2010-06-06	0	42	1	1	1	1	0	0	0	2010-09-15	20.4605	17.1382	-3.32237
19	2010-06-07	1	17	1	0	1	0	0	0	0	2010-09-15	20.4605	17.1711	-3.28947
19	2010-06-10	0	29	1	0	0	0	0	0	0	2010-09-15	20.4605	17.2697	-3.19079
19	2010-06-28	0	35	1	0	1	0	0	0	0	2010-09-15	20.4605	17.8618	-2.59868
19	2010-06-08	1	28	1	1	1	1	0	0	0	2010-09-15	20.4605	17.2039	-3.25658
19	2010-06-06	0	48	1	1	1	1	0	0	0	2010-09-15	20.4605	17.1382	-3.32237
19	2010-06-17	1	58	1	0	1	0	0	0	0	2010-09-15	20.4605	17.5	-2.96053
19	2010-06-14	0	33	1	0	1	0	0	0	0	2010-09-15	20.4605	17.4013	-3.05921
19	2010-06-17	1	34	1	1	1	1	0	0	0	2010-09-15	20.4605	17.5	-2.96053
19	2010-06-11	1	37	1	1	1	1	0	0	0	2010-09-15	20.4605	17.3026	-3.15789
19	2010-06-16	1	53	1	1	1	1	0	0	0	2010-09-15	20.4605	17.4671	-2.99342
19	2010-06-02	1	35	1	1	1	1	0	0	0	2010-09-15	20.4605	17.0066	-3.45395
19	2010-06-29	0	48	1	0	1	0	0	0	0	2010-09-15	20.4605	17.8947	-2.56579
19	2010-06-05	1	30	1	0	1	0	0	0	0	2010-09-15	20.4605	17.1053	-3.35526
19	2010-06-14	1	70	1	1	1	1	0	0	0	2010-09-15	20.4605	17.4013	-3.05921
19	2010-06-02	1	40	1	1	1	1	0	0	0	2010-09-15	20.4605	17.0066	-3.45395
19	2010-06-10	1	40	1	1	1	1	0	0	0	2010-09-15	20.4605	17.2697	-3.19079
19	2010-06-10	0	63	1	1	1	1	0	0	0	2010-09-15	20.4605	17.2697	-3.19079
19	2010-06-14	0	16	1	0	0	0	0	0	0	2010-09-15	20.4605	17.4013	-3.05921
19	2010-06-15	1	27	1	0	0	0	0	0	0	2010-09-15	20.4605	17.4342	-3.02632
19	2010-06-09	1	70	1	1	1	1	0	0	0	2010-09-15	20.4605	17.2368	-3.22368
19	2010-06-16	1	18	1	0	0	0	0	0	0	2010-09-15	20.4605	17.4671	-2.99342
19	2010-06-28	0	25	1	0	1	0	0	0	0	2010-09-15	20.4605	17.8618	-2.59868
19	2010-06-07	0	51	1	0	1	0	0	0	0	2010-09-15	20.4605	17.1711	-3.28947
19	2010-06-21	1	46	1	1	1	1	0	0	0	2010-09-15	20.4605	17.6316	-2.82895
19	2010-06-11	1	48	1	0	1	0	0	0	0	2010-09-15	20.4605	17.3026	-3.15789
19	2010-06-28	0	75	1	0	1	0	0	0	0	2010-09-15	20.4605	17.8618	-2.59868
19	2010-06-26	1	35	1	0	0	0	0	0	0	2010-09-15	20.4605	17.7961	-2.66447
19	2010-06-15	0	50	1	1	1	1	0	0	0	2010-09-15	20.4605	17.4342	-3.02632
19	2010-06-25	1	57	1	1	1	1	0	0	0	2010-09-15	20.4605	17.7632	-2.69737
20	2010-06-18	1	26	1	0	1	0	0	0	0	2010-12-15	23.4539	17.5329	-5.92105
20	2010-06-24	0	45	1	0	1	0	0	0	0	2010-12-15	23.4539	17.7303	-5.72368
20	2010-06-24	1	41	1	0	1	0	0	0	0	2010-12-15	23.4539	17.7303	-5.72368
20	2010-06-29	0	24	1	0	1	0	0	0	0	2010-12-15	23.4539	17.8947	-5.55921
20	2010-06-29	1	17	1	0	1	0	0	0	0	2010-12-15	23.4539	17.8947	-5.55921
20	2010-06-17	1	30	1	0	1	0	0	0	0	2010-12-15	23.4539	17.5	-5.95395
20	2010-06-24	1	30	1	0	1	0	0	0	0	2010-12-15	23.4539	17.7303	-5.72368
20	2010-06-26	1	70	1	0	0	0	0	0	0	2010-12-15	23.4539	17.7961	-5.65789
20	2010-06-29	1	17	1	0	1	0	0	0	0	2010-12-15	23.4539	17.8947	-5.55921
20	2010-06-30	1	30	1	0	1	0	0	0	0	2010-12-15	23.4539	17.9276	-5.52632
20	2010-06-22	0	38	1	0	1	0	0	0	0	2010-12-15	23.4539	17.6645	-5.78947
20	2010-06-30	1	30	1	0	1	0	0	0	0	2010-12-15	23.4539	17.9276	-5.52632
11	2010-07-21	1	34	1	1	1	1	0	0	0	2010-08-15	19.4408	18.6184	-0.822369
11	2010-07-19	1	64	1	1	1	1	0	0	0	2010-08-15	19.4408	18.5526	-0.888159
11	2010-07-01	1	55	1	1	1	1	0	0	0	2010-08-15	19.4408	17.9605	-1.48026
11	2010-07-06	1	24	1	1	1	1	0	0	0	2010-08-15	19.4408	18.125	-1.31579
11	2010-07-16	0	61	1	1	1	1	0	0	0	2010-08-15	19.4408	18.4539	-0.986843
11	2010-07-20	0	59	1	0	0	0	0	0	0	2010-08-15	19.4408	18.5855	-0.855265
11	2010-07-22	1	39	1	0	1	0	0	0	0	2010-08-15	19.4408	18.6513	-0.789474
11	2010-07-21	1	28	1	1	1	1	0	0	0	2010-08-15	19.4408	18.6184	-0.822369
11	2010-07-21	1	40	1	1	1	1	0	0	0	2010-08-15	19.4408	18.6184	-0.822369
11	2010-07-30	0	33	1	0	1	0	0	0	0	2010-08-15	19.4408	18.9145	-0.526316
11	2010-07-30	0	33	1	0	1	0	0	0	0	2010-08-15	19.4408	18.9145	-0.526316
11	2010-07-08	1	38	1	1	1	1	0	0	0	2010-08-15	19.4408	18.1908	-1.25
11	2010-07-05	1	61	1	1	1	1	0	0	0	2010-08-15	19.4408	18.0921	-1.34868
11	2010-07-21	1	42	1	1	1	1	0	0	0	2010-08-15	19.4408	18.6184	-0.822369
11	2010-07-12	0	60	1	1	1	1	1	1	0	2010-08-15	19.4408	18.3224	-1.11842
11	2010-07-30	1	43	1	0	1	0	0	0	0	2010-08-15	19.4408	18.9145	-0.526316
11	2010-07-30	1	25	1	0	1	0	0	0	0	2010-08-15	19.4408	18.9145	-0.526316
11	2010-07-14	1	42	1	1	1	1	0	0	0	2010-08-15	19.4408	18.3882	-1.05263
11	2010-07-05	1	28	1	1	1	1	0	0	0	2010-08-15	19.4408	18.0921	-1.34868
11	2010-07-07	0	15	1	1	1	1	0	0	0	2010-08-15	19.4408	18.1579	-1.2829
11	2010-07-09	0	28	1	0	1	0	0	0	0	2010-08-15	19.4408	18.2237	-1.21711
11	2010-07-30	1	30	1	0	1	0	0	0	0	2010-08-15	19.4408	18.9145	-0.526316
11	2010-07-09	0	35	1	1	1	1	0	0	0	2010-08-15	19.4408	18.2237	-1.21711
11	2010-07-07	0	62	1	1	1	1	1	1	0	2010-08-15	19.4408	18.1579	-1.2829
11	2010-07-19	0	39	1	1	1	1	1	1	0	2010-08-15	19.4408	18.5526	-0.888159
15	2010-07-12	1	60	1	1	1	1	0	0	0	2010-08-15	19.4408	18.3224	-1.11842
15	2010-07-20	1	51	1	0	0	0	0	0	0	2010-08-15	19.4408	18.5855	-0.855265
15	2010-07-20	0	19	1	0	0	0	0	0	0	2010-08-15	19.4408	18.5855	-0.855265
15	2010-07-29	1	45	1	0	0	0	0	0	0	2010-08-15	19.4408	18.8816	-0.559212
15	2010-07-19	0	56	1	1	1	1	0	0	0	2010-08-15	19.4408	18.5526	-0.888159
15	2010-07-12	1	38	1	1	1	1	0	0	0	2010-08-15	19.4408	18.3224	-1.11842
15	2010-07-07	0	58	1	1	1	1	0	0	0	2010-08-15	19.4408	18.1579	-1.2829
15	2010-07-06	1	30	1	0	0	0	0	0	0	2010-08-15	19.4408	18.125	-1.31579
15	2010-07-27	1	37	1	0	0	0	0	0	0	2010-08-15	19.4408	18.8158	-0.625
15	2010-07-21	0	42	1	1	1	1	1	1	0	2010-08-15	19.4408	18.6184	-0.822369
16	2010-07-19	0	53	1	0	1	0	0	0	0	2010-09-15	20.4605	18.5526	-1.90789
16	2010-07-01	0	65	1	1	1	1	0	0	0	2010-09-15	20.4605	17.9605	-2.5
16	2010-07-13	1	80	1	1	1	1	0	0	0	2010-09-15	20.4605	18.3553	-2.10526
16	2010-07-19	0	52	1	0	1	0	0	0	0	2010-09-15	20.4605	18.5526	-1.90789
16	2010-07-08	0	56	1	0	1	0	0	0	0	2010-09-15	20.4605	18.1908	-2.26973
16	2010-07-19	0	20	1	0	1	0	0	0	0	2010-09-15	20.4605	18.5526	-1.90789
16	2010-07-13	1	58	1	1	1	1	0	0	0	2010-09-15	20.4605	18.3553	-2.10526
16	2010-07-12	1	26	1	1	1	1	1	1	0	2010-09-15	20.4605	18.3224	-2.13816
16	2010-07-19	1	48	1	1	1	1	0	0	0	2010-09-15	20.4605	18.5526	-1.90789
16	2010-07-27	1	29	1	1	1	1	0	0	0	2010-09-15	20.4605	18.8158	-1.64474
16	2010-07-19	1	17	1	0	1	0	0	0	0	2010-09-15	20.4605	18.5526	-1.90789
16	2010-07-29	0	25	1	0	1	0	0	0	0	2010-09-15	20.4605	18.8816	-1.57895
16	2010-07-07	1	55	1	1	1	1	0	0	0	2010-09-15	20.4605	18.1579	-2.30263
16	2010-07-07	1	34	1	1	1	1	1	0	0	2010-09-15	20.4605	18.1579	-2.30263
16	2010-07-27	0	17	1	1	1	1	0	0	0	2010-09-15	20.4605	18.8158	-1.64474
16	2010-07-09	0	30	1	1	1	1	0	0	0	2010-09-15	20.4605	18.2237	-2.23684
16	2010-07-02	1	40	1	1	1	1	0	0	0	2010-09-15	20.4605	17.9934	-2.4671
16	2010-07-06	1	27	1	0	1	0	0	0	0	2010-09-15	20.4605	18.125	-2.33553
16	2010-07-13	0	53	1	1	1	1	0	0	0	2010-09-15	20.4605	18.3553	-2.10526
16	2010-07-08	1	70	1	1	1	1	0	0	0	2010-09-15	20.4605	18.1908	-2.26973
16	2010-07-16	1	35	1	1	1	1	0	0	0	2010-09-15	20.4605	18.4539	-2.00658
16	2010-07-21	1	30	1	1	1	1	0	0	0	2010-09-15	20.4605	18.6184	-1.8421
17	2010-07-01	1	75	1	0	0	0	0	0	0	2010-10-15	21.4474	17.9605	-3.48684
17	2010-07-30	1	41	1	0	0	0	0	0	0	2010-10-15	21.4474	18.9145	-2.53289
17	2010-07-15	0	21	1	0	0	0	0	0	0	2010-10-15	21.4474	18.4211	-3.02632
17	2010-07-01	1	53	1	0	0	0	0	0	0	2010-10-15	21.4474	17.9605	-3.48684
17	2010-07-14	1	46	1	0	1	0	0	0	0	2010-10-15	21.4474	18.3882	-3.05921
17	2010-07-08	1	38	1	0	1	0	0	0	0	2010-10-15	21.4474	18.1908	-3.25658
17	2010-07-12	1	38	1	0	0	0	0	0	0	2010-10-15	21.4474	18.3224	-3.125
17	2010-07-14	1	32	1	0	0	0	0	0	0	2010-10-15	21.4474	18.3882	-3.05921
17	2010-07-21	1	25	1	0	0	0	0	0	0	2010-10-15	21.4474	18.6184	-2.82895
17	2010-07-26	1	52	1	0	0	0	0	0	0	2010-10-15	21.4474	18.7829	-2.66447
17	2010-07-06	1	40	1	1	1	1	1	1	0	2010-10-15	21.4474	18.125	-3.32237
17	2010-07-08	1	56	1	0	0	0	0	0	0	2010-10-15	21.4474	18.1908	-3.25658
17	2010-07-16	1	26	1	0	0	0	0	0	0	2010-10-15	21.4474	18.4539	-2.99342
17	2010-07-13	0	19	1	0	0	0	0	0	0	2010-10-15	21.4474	18.3553	-3.09211
17	2010-07-26	1	15	1	0	0	0	0	0	0	2010-10-15	21.4474	18.7829	-2.66447
17	2010-07-16	1	26	1	0	0	0	0	0	0	2010-10-15	21.4474	18.4539	-2.99342
17	2010-07-12	1	39	1	0	0	0	0	0	0	2010-10-15	21.4474	18.3224	-3.125
17	2010-07-21	0	35	1	0	0	0	0	0	0	2010-10-15	21.4474	18.6184	-2.82895
17	2010-07-26	1	60	1	0	0	0	0	0	0	2010-10-15	21.4474	18.7829	-2.66447
17	2010-07-06	1	53	1	0	0	0	0	0	0	2010-10-15	21.4474	18.125	-3.32237
17	2010-07-01	1	24	1	0	0	0	0	0	0	2010-10-15	21.4474	17.9605	-3.48684
17	2010-07-28	1	36	1	1	1	1	0	0	0	2010-10-15	21.4474	18.8487	-2.59868
17	2010-07-19	1	49	1	0	0	0	0	0	0	2010-10-15	21.4474	18.5526	-2.89474
17	2010-07-01	0	56	1	0	0	0	0	0	0	2010-10-15	21.4474	17.9605	-3.48684
17	2010-07-09	1	29	1	0	0	0	0	0	0	2010-10-15	21.4474	18.2237	-3.22368
17	2010-07-13	1	39	1	0	0	0	0	0	0	2010-10-15	21.4474	18.3553	-3.09211
17	2010-07-06	1	38	1	0	0	0	0	0	0	2010-10-15	21.4474	18.125	-3.32237
17	2010-07-29	1	23	1	0	0	0	0	0	0	2010-10-15	21.4474	18.8816	-2.56579
17	2010-07-26	0	52	1	0	0	0	0	0	0	2010-10-15	21.4474	18.7829	-2.66447
17	2010-07-28	0	31	1	1	1	1	0	0	0	2010-10-15	21.4474	18.8487	-2.59868
17	2010-07-16	1	35	1	0	0	0	0	0	0	2010-10-15	21.4474	18.4539	-2.99342
17	2010-07-01	0	30	1	0	0	0	0	0	0	2010-10-15	21.4474	17.9605	-3.48684
17	2010-07-19	0	63	1	0	0	0	0	0	0	2010-10-15	21.4474	18.5526	-2.89474
17	2010-07-26	1	55	1	0	0	0	0	0	0	2010-10-15	21.4474	18.7829	-2.66447
17	2010-07-29	1	36	1	0	0	0	0	0	0	2010-10-15	21.4474	18.8816	-2.56579
17	2010-07-15	1	23	1	0	0	0	0	0	0	2010-10-15	21.4474	18.4211	-3.02632
17	2010-07-16	0	64	1	1	1	1	1	1	0	2010-10-15	21.4474	18.4539	-2.99342
17	2010-07-15	0	19	1	0	0	0	0	0	0	2010-10-15	21.4474	18.4211	-3.02632
17	2010-07-21	0	51	1	1	1	1	0	0	0	2010-10-15	21.4474	18.6184	-2.82895
17	2010-07-01	1	28	1	0	0	0	0	0	0	2010-10-15	21.4474	17.9605	-3.48684
17	2010-07-01	1	70	1	0	0	0	0	0	0	2010-10-15	21.4474	17.9605	-3.48684
17	2010-07-29	0	18	1	1	1	1	0	0	0	2010-10-15	21.4474	18.8816	-2.56579
17	2010-07-01	0	63	1	1	1	1	0	0	0	2010-10-15	21.4474	17.9605	-3.48684
19	2010-07-14	1	49	1	0	0	0	0	0	0	2010-09-15	20.4605	18.3882	-2.07237
19	2010-07-08	1	60	1	0	1	0	0	0	0	2010-09-15	20.4605	18.1908	-2.26973
19	2010-07-22	0	58	1	0	0	0	0	0	0	2010-09-15	20.4605	18.6513	-1.80921
19	2010-07-20	1	42	1	0	0	0	0	0	0	2010-09-15	20.4605	18.5855	-1.875
19	2010-07-09	1	31	1	0	1	0	0	0	0	2010-09-15	20.4605	18.2237	-2.23684
19	2010-07-28	0	38	1	0	0	0	0	0	0	2010-09-15	20.4605	18.8487	-1.61184
19	2010-07-27	0	18	1	1	1	1	0	0	0	2010-09-15	20.4605	18.8158	-1.64474
19	2010-07-10	1	60	1	1	1	1	0	0	0	2010-09-15	20.4605	18.2566	-2.20395
19	2010-07-14	1	28	1	0	1	0	0	0	0	2010-09-15	20.4605	18.3882	-2.07237
19	2010-07-16	0	17	1	0	0	0	0	0	0	2010-09-15	20.4605	18.4539	-2.00658
19	2010-07-20	0	16	1	0	1	0	0	0	0	2010-09-15	20.4605	18.5855	-1.875
19	2010-07-19	0	80	1	0	1	0	0	0	0	2010-09-15	20.4605	18.5526	-1.90789
19	2010-07-16	0	57	1	1	1	1	1	1	0	2010-09-15	20.4605	18.4539	-2.00658
19	2010-07-19	1	40	1	1	1	1	0	0	0	2010-09-15	20.4605	18.5526	-1.90789
19	2010-07-05	0	47	1	0	1	0	0	0	0	2010-09-15	20.4605	18.0921	-2.36842
19	2010-07-22	1	19	1	0	0	0	0	0	0	2010-09-15	20.4605	18.6513	-1.80921
19	2010-07-19	0	70	1	0	1	0	0	0	0	2010-09-15	20.4605	18.5526	-1.90789
19	2010-07-01	1	21	1	0	1	0	0	0	0	2010-09-15	20.4605	17.9605	-2.5
19	2010-07-17	0	38	1	0	0	0	0	0	0	2010-09-15	20.4605	18.4868	-1.97368
19	2010-07-12	1	30	1	1	1	1	0	0	0	2010-09-15	20.4605	18.3224	-2.13816
19	2010-07-07	1	43	1	0	1	0	0	0	0	2010-09-15	20.4605	18.1579	-2.30263
19	2010-07-08	0	52	1	0	1	0	0	0	0	2010-09-15	20.4605	18.1908	-2.26973
20	2010-07-15	0	70	1	0	0	0	0	0	0	2010-12-15	23.4539	18.4211	-5.03289
20	2010-07-14	1	25	1	0	0	0	0	0	0	2010-12-15	23.4539	18.3882	-5.06579
20	2010-07-07	1	23	1	0	0	0	0	0	0	2010-12-15	23.4539	18.1579	-5.29605
20	2010-07-17	0	60	1	0	1	1	0	1	0	2010-12-15	23.4539	18.4868	-4.96711
20	2010-07-15	1	32	1	1	1	1	0	0	0	2010-12-15	23.4539	18.4211	-5.03289
20	2010-07-21	1	28	1	0	1	0	0	0	0	2010-12-15	23.4539	18.6184	-4.83553
20	2010-07-12	1	32	1	0	0	0	0	0	0	2010-12-15	23.4539	18.3224	-5.13158
20	2010-07-09	1	28	1	0	0	0	0	0	0	2010-12-15	23.4539	18.2237	-5.23026
20	2010-07-08	0	17	1	0	0	0	0	0	0	2010-12-15	23.4539	18.1908	-5.26316
20	2010-07-23	0	35	1	0	1	0	0	0	0	2010-12-15	23.4539	18.6842	-4.76974
20	2010-07-26	1	45	1	1	1	1	0	0	0	2010-12-15	23.4539	18.7829	-4.67105
20	2010-07-30	1	25	1	0	1	0	0	0	0	2010-12-15	23.4539	18.9145	-4.53947
20	2010-07-26	1	26	1	0	0	0	0	0	0	2010-12-15	23.4539	18.7829	-4.67105
11	2010-08-10	1	45	1	1	1	1	0	0	0	2010-08-15	19.4408	19.2763	-0.164474
11	2010-08-27	1	24	1	1	1	1	1	1	1	2010-08-15	19.4408	19.8355	0.394735
11	2010-08-05	0	33	1	1	1	1	0	0	0	2010-08-15	19.4408	19.1118	-0.328949
11	2010-08-12	0	48	1	1	1	1	0	0	0	2010-08-15	19.4408	19.3421	-0.0986843
11	2010-08-13	0	43	1	0	0	0	0	0	0	2010-08-15	19.4408	19.375	-0.0657902
11	2010-08-20	0	40	1	1	1	1	0	0	1	2010-08-15	19.4408	19.6053	0.164473
11	2010-08-10	1	40	1	1	1	1	0	0	0	2010-08-15	19.4408	19.2763	-0.164474
11	2010-08-09	0	50	1	1	1	1	1	1	0	2010-08-15	19.4408	19.2434	-0.197369
11	2010-08-23	1	52	1	1	1	1	0	0	1	2010-08-15	19.4408	19.7039	0.263157
11	2010-08-20	1	43	1	0	1	0	0	0	1	2010-08-15	19.4408	19.6053	0.164473
11	2010-08-16	1	32	1	1	1	1	0	0	1	2010-08-15	19.4408	19.4737	0.0328941
11	2010-08-10	1	35	1	0	1	0	0	0	0	2010-08-15	19.4408	19.2763	-0.164474
11	2010-08-18	0	83	1	1	1	1	0	0	1	2010-08-15	19.4408	19.5395	0.0986843
11	2010-08-09	0	34	1	1	1	1	0	0	0	2010-08-15	19.4408	19.2434	-0.197369
11	2010-08-20	1	60	1	0	1	0	0	0	1	2010-08-15	19.4408	19.6053	0.164473
11	2010-08-18	1	45	1	1	1	1	0	0	1	2010-08-15	19.4408	19.5395	0.0986843
11	2010-08-30	1	30	1	1	1	1	1	1	1	2010-08-15	19.4408	19.9342	0.49342
11	2010-08-09	1	15	1	1	1	1	0	0	0	2010-08-15	19.4408	19.2434	-0.197369
11	2010-08-20	1	70	1	0	1	1	0	1	1	2010-08-15	19.4408	19.6053	0.164473
11	2010-08-20	1	43	1	0	1	1	0	1	1	2010-08-15	19.4408	19.6053	0.164473
11	2010-08-18	1	70	1	1	1	1	0	0	1	2010-08-15	19.4408	19.5395	0.0986843
11	2010-08-20	0	33	1	1	1	1	1	1	1	2010-08-15	19.4408	19.6053	0.164473
11	2010-08-27	1	37	1	1	1	1	0	0	1	2010-08-15	19.4408	19.8355	0.394735
11	2010-08-24	1	15	1	1	1	1	0	0	1	2010-08-15	19.4408	19.7368	0.296051
11	2010-08-25	0	70	1	1	1	1	0	0	1	2010-08-15	19.4408	19.7697	0.328947
11	2010-08-12	1	28	1	0	1	0	0	0	0	2010-08-15	19.4408	19.3421	-0.0986843
11	2010-08-04	1	70	1	0	1	0	0	0	0	2010-08-15	19.4408	19.0789	-0.361843
11	2010-08-18	0	78	1	1	1	1	0	0	1	2010-08-15	19.4408	19.5395	0.0986843
11	2010-08-06	0	45	1	1	1	1	0	0	0	2010-08-15	19.4408	19.1447	-0.296053
11	2010-08-06	1	55	1	1	1	1	0	0	0	2010-08-15	19.4408	19.1447	-0.296053
11	2010-08-11	0	55	1	1	1	1	0	0	0	2010-08-15	19.4408	19.3092	-0.13158
11	2010-08-19	1	19	1	0	1	0	0	0	1	2010-08-15	19.4408	19.5724	0.131578
15	2010-08-09	0	18	1	1	1	1	0	0	0	2010-08-15	19.4408	19.2434	-0.197369
15	2010-08-23	0	61	1	0	0	0	0	0	1	2010-08-15	19.4408	19.7039	0.263157
15	2010-08-02	0	84	1	1	1	1	0	0	0	2010-08-15	19.4408	19.0132	-0.427631
15	2010-08-11	1	45	1	0	0	0	0	0	0	2010-08-15	19.4408	19.3092	-0.13158
15	2010-08-10	0	68	1	1	1	1	0	0	0	2010-08-15	19.4408	19.2763	-0.164474
15	2010-08-20	1	24	1	0	0	0	0	0	1	2010-08-15	19.4408	19.6053	0.164473
15	2010-08-02	0	65	1	1	1	1	0	0	0	2010-08-15	19.4408	19.0132	-0.427631
15	2010-08-09	1	70	1	1	1	1	0	0	0	2010-08-15	19.4408	19.2434	-0.197369
15	2010-08-02	1	60	1	1	1	1	0	0	0	2010-08-15	19.4408	19.0132	-0.427631
15	2010-08-14	1	66	1	1	1	1	0	0	0	2010-08-15	19.4408	19.4079	-0.032896
15	2010-08-12	1	18	1	1	1	1	0	0	0	2010-08-15	19.4408	19.3421	-0.0986843
15	2010-08-09	1	20	1	1	1	1	0	0	0	2010-08-15	19.4408	19.2434	-0.197369
15	2010-08-18	0	67	1	0	0	0	0	0	1	2010-08-15	19.4408	19.5395	0.0986843
15	2010-08-13	1	45	1	1	1	1	0	0	0	2010-08-15	19.4408	19.375	-0.0657902
15	2010-08-03	1	35	1	0	0	0	0	0	0	2010-08-15	19.4408	19.0461	-0.394737
15	2010-08-04	0	38	1	1	1	1	1	1	0	2010-08-15	19.4408	19.0789	-0.361843
15	2010-08-23	0	36	1	0	0	0	0	0	1	2010-08-15	19.4408	19.7039	0.263157
16	2010-08-11	1	70	1	0	1	0	0	0	0	2010-09-15	20.4605	19.3092	-1.15132
16	2010-08-04	0	37	1	1	1	1	0	0	0	2010-09-15	20.4605	19.0789	-1.38158
16	2010-08-04	1	25	1	0	0	0	0	0	0	2010-09-15	20.4605	19.0789	-1.38158
16	2010-08-19	0	52	1	1	1	1	0	0	0	2010-09-15	20.4605	19.5724	-0.888157
16	2010-08-23	1	34	1	1	1	1	0	0	0	2010-09-15	20.4605	19.7039	-0.756578
16	2010-08-10	1	40	1	0	0	0	0	0	0	2010-09-15	20.4605	19.2763	-1.18421
16	2010-08-17	1	46	1	1	1	1	0	0	0	2010-09-15	20.4605	19.5066	-0.953947
16	2010-08-03	1	35	1	0	0	0	0	0	0	2010-09-15	20.4605	19.0461	-1.41447
16	2010-08-11	1	41	1	0	0	0	0	0	0	2010-09-15	20.4605	19.3092	-1.15132
16	2010-08-16	0	35	1	0	0	0	0	0	0	2010-09-15	20.4605	19.4737	-0.986841
16	2010-08-06	1	47	1	1	1	1	0	0	0	2010-09-15	20.4605	19.1447	-1.31579
16	2010-08-19	1	24	1	1	1	1	0	0	0	2010-09-15	20.4605	19.5724	-0.888157
16	2010-08-04	0	45	1	0	1	1	0	1	0	2010-09-15	20.4605	19.0789	-1.38158
16	2010-08-24	0	50	1	1	1	1	0	0	0	2010-09-15	20.4605	19.7368	-0.723684
16	2010-08-10	0	32	1	0	0	0	0	0	0	2010-09-15	20.4605	19.2763	-1.18421
16	2010-08-11	1	50	1	1	1	1	0	0	0	2010-09-15	20.4605	19.3092	-1.15132
16	2010-08-10	1	80	1	1	1	1	0	0	0	2010-09-15	20.4605	19.2763	-1.18421
16	2010-08-25	1	55	1	1	1	1	0	0	0	2010-09-15	20.4605	19.7697	-0.690788
16	2010-08-27	1	16	1	1	1	1	0	0	0	2010-09-15	20.4605	19.8355	-0.625
16	2010-08-16	0	39	1	0	0	0	0	0	0	2010-09-15	20.4605	19.4737	-0.986841
16	2010-08-16	1	50	1	1	1	1	0	0	0	2010-09-15	20.4605	19.4737	-0.986841
16	2010-08-31	0	24	1	1	1	1	0	0	0	2010-09-15	20.4605	19.9671	-0.49342
16	2010-08-23	0	33	1	1	1	1	0	0	0	2010-09-15	20.4605	19.7039	-0.756578
16	2010-08-17	1	56	1	1	1	1	0	0	0	2010-09-15	20.4605	19.5066	-0.953947
16	2010-08-26	1	29	1	1	1	1	0	0	0	2010-09-15	20.4605	19.8026	-0.657894
16	2010-08-18	1	45	1	1	1	1	0	0	0	2010-09-15	20.4605	19.5395	-0.921051
16	2010-08-13	1	36	1	1	1	1	1	1	0	2010-09-15	20.4605	19.375	-1.08553
16	2010-08-27	1	29	1	1	1	1	0	0	0	2010-09-15	20.4605	19.8355	-0.625
16	2010-08-31	1	33	1	1	1	1	1	1	0	2010-09-15	20.4605	19.9671	-0.49342
16	2010-08-05	1	30	1	1	1	1	0	0	0	2010-09-15	20.4605	19.1118	-1.34868
16	2010-08-06	1	52	1	0	0	0	0	0	0	2010-09-15	20.4605	19.1447	-1.31579
16	2010-08-18	1	30	1	1	1	1	1	0	0	2010-09-15	20.4605	19.5395	-0.921051
16	2010-08-13	0	30	1	1	1	1	0	0	0	2010-09-15	20.4605	19.375	-1.08553
16	2010-08-18	0	33	1	1	1	1	0	0	0	2010-09-15	20.4605	19.5395	-0.921051
16	2010-08-06	0	45	1	1	1	1	0	0	0	2010-09-15	20.4605	19.1447	-1.31579
16	2010-08-18	0	33	1	1	1	1	0	0	0	2010-09-15	20.4605	19.5395	-0.921051
16	2010-08-23	1	24	1	1	1	1	0	0	0	2010-09-15	20.4605	19.7039	-0.756578
16	2010-08-26	0	33	1	1	1	1	0	0	0	2010-09-15	20.4605	19.8026	-0.657894
16	2010-08-01	1	23	1	1	1	1	0	0	0	2010-09-15	20.4605	18.9803	-1.48026
16	2010-08-19	1	24	1	1	1	1	0	0	0	2010-09-15	20.4605	19.5724	-0.888157
16	2010-08-23	0	38	1	0	1	0	0	0	0	2010-09-15	20.4605	19.7039	-0.756578
16	2010-08-11	1	35	1	1	1	1	0	0	0	2010-09-15	20.4605	19.3092	-1.15132
16	2010-08-18	0	30	1	1	1	1	0	0	0	2010-09-15	20.4605	19.5395	-0.921051
16	2010-08-04	0	40	1	1	1	1	1	1	0	2010-09-15	20.4605	19.0789	-1.38158
16	2010-08-16	1	29	1	1	1	1	0	0	0	2010-09-15	20.4605	19.4737	-0.986841
16	2010-08-10	1	40	1	1	1	1	0	0	0	2010-09-15	20.4605	19.2763	-1.18421
16	2010-08-18	1	15	1	1	1	1	0	0	0	2010-09-15	20.4605	19.5395	-0.921051
16	2010-08-23	0	50	1	1	1	1	0	0	0	2010-09-15	20.4605	19.7039	-0.756578
16	2010-08-25	0	30	1	1	1	1	0	0	0	2010-09-15	20.4605	19.7697	-0.690788
16	2010-08-26	0	30	1	1	1	1	1	0	0	2010-09-15	20.4605	19.8026	-0.657894
16	2010-08-05	1	26	1	1	1	1	0	0	0	2010-09-15	20.4605	19.1118	-1.34868
16	2010-08-11	1	32	1	1	1	1	0	0	0	2010-09-15	20.4605	19.3092	-1.15132
16	2010-08-06	0	33	1	1	1	1	0	0	0	2010-09-15	20.4605	19.1447	-1.31579
16	2010-08-05	1	76	1	1	1	1	0	0	0	2010-09-15	20.4605	19.1118	-1.34868
16	2010-08-18	1	40	1	1	1	1	0	0	0	2010-09-15	20.4605	19.5395	-0.921051
17	2010-08-18	0	54	1	0	0	0	0	0	0	2010-10-15	21.4474	19.5395	-1.90789
17	2010-08-11	0	35	1	1	1	1	1	1	0	2010-10-15	21.4474	19.3092	-2.13816
17	2010-08-04	0	47	1	0	1	0	0	0	0	2010-10-15	21.4474	19.0789	-2.36842
17	2010-08-16	1	23	1	0	0	0	0	0	0	2010-10-15	21.4474	19.4737	-1.97368
17	2010-08-12	0	47	1	0	0	0	0	0	0	2010-10-15	21.4474	19.3421	-2.10526
17	2010-08-06	1	80	1	0	0	0	0	0	0	2010-10-15	21.4474	19.1447	-2.30263
17	2010-08-24	0	53	1	0	1	0	0	0	0	2010-10-15	21.4474	19.7368	-1.71053
17	2010-08-16	0	33	1	0	0	0	0	0	0	2010-10-15	21.4474	19.4737	-1.97368
17	2010-08-09	0	24	1	0	0	0	0	0	0	2010-10-15	21.4474	19.2434	-2.20395
17	2010-08-13	1	43	1	0	0	0	0	0	0	2010-10-15	21.4474	19.375	-2.07237
17	2010-08-13	1	65	1	0	0	0	0	0	0	2010-10-15	21.4474	19.375	-2.07237
17	2010-08-04	1	32	1	0	0	0	0	0	0	2010-10-15	21.4474	19.0789	-2.36842
17	2010-08-04	1	30	1	0	0	0	0	0	0	2010-10-15	21.4474	19.0789	-2.36842
17	2010-08-05	0	60	1	0	1	0	0	0	0	2010-10-15	21.4474	19.1118	-2.33553
17	2010-08-02	0	47	1	0	1	0	0	0	0	2010-10-15	21.4474	19.0132	-2.43421
17	2010-08-04	0	19	1	0	0	0	0	0	0	2010-10-15	21.4474	19.0789	-2.36842
17	2010-08-09	0	30	1	0	0	0	0	0	0	2010-10-15	21.4474	19.2434	-2.20395
17	2010-08-13	1	18	1	0	0	0	0	0	0	2010-10-15	21.4474	19.375	-2.07237
17	2010-08-06	1	28	1	0	0	0	0	0	0	2010-10-15	21.4474	19.1447	-2.30263
17	2010-08-02	0	38	1	0	0	0	0	0	0	2010-10-15	21.4474	19.0132	-2.43421
17	2010-08-10	1	19	1	0	0	0	0	0	0	2010-10-15	21.4474	19.2763	-2.17105
17	2010-08-24	1	67	1	1	1	1	0	0	0	2010-10-15	21.4474	19.7368	-1.71053
17	2010-08-02	0	19	1	0	0	0	0	0	0	2010-10-15	21.4474	19.0132	-2.43421
17	2010-08-06	1	16	1	0	0	0	0	0	0	2010-10-15	21.4474	19.1447	-2.30263
17	2010-08-05	1	18	1	0	0	0	0	0	0	2010-10-15	21.4474	19.1118	-2.33553
17	2010-08-12	1	30	1	0	0	0	0	0	0	2010-10-15	21.4474	19.3421	-2.10526
17	2010-08-09	0	25	1	0	0	0	0	0	0	2010-10-15	21.4474	19.2434	-2.20395
17	2010-08-24	0	18	1	0	1	0	0	0	0	2010-10-15	21.4474	19.7368	-1.71053
19	2010-08-04	1	21	1	0	0	0	0	0	0	2010-09-15	20.4605	19.0789	-1.38158
19	2010-08-30	0	64	1	0	1	0	0	0	0	2010-09-15	20.4605	19.9342	-0.526316
19	2010-08-24	1	37	1	0	1	0	0	0	0	2010-09-15	20.4605	19.7368	-0.723684
19	2010-08-12	1	60	1	0	1	0	0	0	0	2010-09-15	20.4605	19.3421	-1.11842
19	2010-08-25	0	35	1	0	0	0	0	0	0	2010-09-15	20.4605	19.7697	-0.690788
19	2010-08-23	1	80	1	0	1	0	0	0	0	2010-09-15	20.4605	19.7039	-0.756578
19	2010-08-27	1	70	1	0	1	0	0	0	0	2010-09-15	20.4605	19.8355	-0.625
19	2010-08-09	0	43	1	1	1	1	0	0	0	2010-09-15	20.4605	19.2434	-1.2171
19	2010-08-19	0	52	1	0	0	0	0	0	0	2010-09-15	20.4605	19.5724	-0.888157
19	2010-08-19	0	72	1	1	1	1	0	0	0	2010-09-15	20.4605	19.5724	-0.888157
19	2010-08-14	1	78	1	0	1	0	0	0	0	2010-09-15	20.4605	19.4079	-1.05263
19	2010-08-20	0	45	1	0	1	1	0	1	0	2010-09-15	20.4605	19.6053	-0.855263
19	2010-08-03	1	50	1	0	0	0	0	0	0	2010-09-15	20.4605	19.0461	-1.41447
19	2010-08-18	0	41	1	0	0	0	0	0	0	2010-09-15	20.4605	19.5395	-0.921051
19	2010-08-05	1	26	1	0	0	0	0	0	0	2010-09-15	20.4605	19.1118	-1.34868
19	2010-08-20	1	24	1	0	0	0	0	0	0	2010-09-15	20.4605	19.6053	-0.855263
19	2010-08-25	0	54	1	0	1	1	0	1	0	2010-09-15	20.4605	19.7697	-0.690788
19	2010-08-05	0	58	1	0	0	0	0	0	0	2010-09-15	20.4605	19.1118	-1.34868
19	2010-08-24	1	40	1	1	1	1	0	0	0	2010-09-15	20.4605	19.7368	-0.723684
19	2010-08-31	0	15	1	0	0	0	0	0	0	2010-09-15	20.4605	19.9671	-0.49342
19	2010-08-14	1	70	1	0	1	0	0	0	0	2010-09-15	20.4605	19.4079	-1.05263
19	2010-08-25	1	25	1	1	1	1	0	0	0	2010-09-15	20.4605	19.7697	-0.690788
19	2010-08-09	0	33	1	0	0	0	0	0	0	2010-09-15	20.4605	19.2434	-1.2171
19	2010-08-11	0	45	1	1	1	1	0	0	0	2010-09-15	20.4605	19.3092	-1.15132
19	2010-08-27	1	25	1	0	0	0	0	0	0	2010-09-15	20.4605	19.8355	-0.625
19	2010-08-23	1	28	1	0	0	0	0	0	0	2010-09-15	20.4605	19.7039	-0.756578
19	2010-08-12	1	30	1	1	1	1	0	0	0	2010-09-15	20.4605	19.3421	-1.11842
19	2010-08-04	1	22	1	0	1	0	0	0	0	2010-09-15	20.4605	19.0789	-1.38158
19	2010-08-02	0	42	1	0	0	0	0	0	0	2010-09-15	20.4605	19.0132	-1.44737
19	2010-08-21	1	18	1	0	0	0	0	0	0	2010-09-15	20.4605	19.6382	-0.822367
19	2010-08-23	1	21	1	1	1	1	0	0	0	2010-09-15	20.4605	19.7039	-0.756578
19	2010-08-05	0	35	1	1	1	1	0	0	0	2010-09-15	20.4605	19.1118	-1.34868
19	2010-08-14	1	62	1	0	1	0	0	0	0	2010-09-15	20.4605	19.4079	-1.05263
19	2010-08-18	1	40	1	0	0	0	0	0	0	2010-09-15	20.4605	19.5395	-0.921051
19	2010-08-18	0	80	1	0	0	0	0	0	0	2010-09-15	20.4605	19.5395	-0.921051
19	2010-08-19	1	28	1	0	1	0	0	0	0	2010-09-15	20.4605	19.5724	-0.888157
20	2010-08-04	0	47	1	1	1	1	0	0	0	2010-12-15	23.4539	19.0789	-4.375
20	2010-08-16	1	32	1	0	1	0	0	0	0	2010-12-15	23.4539	19.4737	-3.98026
20	2010-08-14	0	17	1	0	0	0	0	0	0	2010-12-15	23.4539	19.4079	-4.04605
20	2010-08-05	0	19	1	1	1	1	0	0	0	2010-12-15	23.4539	19.1118	-4.34211
20	2010-08-26	1	40	1	0	0	0	0	0	0	2010-12-15	23.4539	19.8026	-3.65132
20	2010-08-20	1	27	1	0	0	0	0	0	0	2010-12-15	23.4539	19.6053	-3.84868
20	2010-08-10	1	50	1	0	1	0	0	0	0	2010-12-15	23.4539	19.2763	-4.17763
20	2010-08-07	0	72	1	0	1	0	0	0	0	2010-12-15	23.4539	19.1776	-4.27632
20	2010-08-04	1	22	1	1	1	1	0	0	0	2010-12-15	23.4539	19.0789	-4.375
20	2010-08-02	1	32	1	0	0	0	0	0	0	2010-12-15	23.4539	19.0132	-4.44079
20	2010-08-16	0	22	1	0	0	0	0	0	0	2010-12-15	23.4539	19.4737	-3.98026
20	2010-08-06	1	38	1	0	1	0	0	0	0	2010-12-15	23.4539	19.1447	-4.30921
11	2010-09-15	1	17	1	1	1	1	0	0	1	2010-08-15	19.4408	20.4605	1.01974
11	2010-09-13	1	28	1	1	1	1	0	0	1	2010-08-15	19.4408	20.3947	0.953947
11	2010-09-17	0	68	1	1	1	1	0	0	1	2010-08-15	19.4408	20.5263	1.08553
11	2010-09-13	1	70	1	1	1	1	0	0	1	2010-08-15	19.4408	20.3947	0.953947
11	2010-09-15	1	60	1	1	1	1	0	0	1	2010-08-15	19.4408	20.4605	1.01974
11	2010-09-07	0	27	1	1	1	1	1	1	1	2010-08-15	19.4408	20.1974	0.756578
11	2010-09-13	0	33	1	1	1	1	0	0	1	2010-08-15	19.4408	20.3947	0.953947
11	2010-09-24	0	60	1	1	1	1	0	0	1	2010-08-15	19.4408	20.7566	1.31579
11	2010-09-16	1	75	1	1	1	1	0	0	1	2010-08-15	19.4408	20.4934	1.05263
11	2010-09-27	0	47	1	1	1	1	0	0	1	2010-08-15	19.4408	20.8553	1.41447
11	2010-09-30	0	41	1	1	1	1	1	1	1	2010-08-15	19.4408	20.9539	1.51316
11	2010-09-17	0	20	1	1	1	1	0	0	1	2010-08-15	19.4408	20.5263	1.08553
11	2010-09-24	0	73	1	1	1	1	0	0	1	2010-08-15	19.4408	20.7566	1.31579
11	2010-09-24	1	37	1	1	1	1	0	0	1	2010-08-15	19.4408	20.7566	1.31579
11	2010-09-24	1	40	1	1	1	1	0	0	1	2010-08-15	19.4408	20.7566	1.31579
11	2010-09-30	0	39	1	1	1	1	1	1	1	2010-08-15	19.4408	20.9539	1.51316
11	2010-09-06	0	48	1	1	1	1	1	1	1	2010-08-15	19.4408	20.1645	0.723684
11	2010-09-14	0	23	1	1	1	1	0	0	1	2010-08-15	19.4408	20.4276	0.986841
15	2010-09-16	0	43	1	0	0	0	0	0	1	2010-08-15	19.4408	20.4934	1.05263
15	2010-09-02	1	43	1	1	1	1	0	0	1	2010-08-15	19.4408	20.0329	0.592104
16	2010-09-08	1	70	1	0	1	0	0	0	0	2010-09-15	20.4605	20.2303	-0.230263
16	2010-09-06	0	24	1	1	1	1	0	0	0	2010-09-15	20.4605	20.1645	-0.296051
16	2010-09-29	0	46	1	0	1	1	0	1	1	2010-09-15	20.4605	20.9211	0.460527
16	2010-09-08	0	44	1	1	1	1	0	0	0	2010-09-15	20.4605	20.2303	-0.230263
16	2010-09-23	1	26	1	1	1	1	0	0	1	2010-09-15	20.4605	20.7237	0.263159
16	2010-09-16	1	37	1	1	1	1	0	0	1	2010-09-15	20.4605	20.4934	0.032896
16	2010-09-28	0	37	1	1	1	1	1	0	1	2010-09-15	20.4605	20.8882	0.427633
16	2010-09-28	1	39	1	1	1	1	0	0	1	2010-09-15	20.4605	20.8882	0.427633
16	2010-09-15	0	33	1	1	1	1	0	0	0	2010-09-15	20.4605	20.4605	0
16	2010-09-01	0	60	1	1	1	1	0	0	0	2010-09-15	20.4605	20	-0.460525
16	2010-09-08	0	38	1	1	1	1	0	0	0	2010-09-15	20.4605	20.2303	-0.230263
16	2010-09-10	0	78	1	1	1	1	0	0	0	2010-09-15	20.4605	20.2961	-0.164473
16	2010-09-28	0	20	1	1	1	1	0	0	1	2010-09-15	20.4605	20.8882	0.427633
16	2010-09-29	1	22	1	1	1	1	0	0	1	2010-09-15	20.4605	20.9211	0.460527
16	2010-09-29	1	22	1	0	0	0	0	0	1	2010-09-15	20.4605	20.9211	0.460527
17	2010-09-21	1	20	1	0	0	0	0	0	0	2010-10-15	21.4474	20.6579	-0.789474
17	2010-09-28	0	16	1	1	1	1	1	1	0	2010-10-15	21.4474	20.8882	-0.55921
17	2010-09-15	1	31	1	0	0	0	0	0	0	2010-10-15	21.4474	20.4605	-0.986843
17	2010-09-06	0	55	1	1	1	1	0	0	0	2010-10-15	21.4474	20.1645	-1.28289
17	2010-09-30	1	51	1	1	1	1	0	0	0	2010-10-15	21.4474	20.9539	-0.493422
17	2010-09-10	1	29	1	0	0	0	0	0	0	2010-10-15	21.4474	20.2961	-1.15132
17	2010-09-06	0	38	1	1	1	1	0	0	0	2010-10-15	21.4474	20.1645	-1.28289
17	2010-09-15	0	18	1	1	1	1	0	0	0	2010-10-15	21.4474	20.4605	-0.986843
17	2010-09-24	1	38	1	0	0	0	0	0	0	2010-10-15	21.4474	20.7566	-0.69079
17	2010-09-14	1	25	1	0	0	0	0	0	0	2010-10-15	21.4474	20.4276	-1.01974
17	2010-09-22	0	80	1	1	1	1	0	0	0	2010-10-15	21.4474	20.6908	-0.756578
17	2010-09-06	0	58	1	1	1	1	0	0	0	2010-10-15	21.4474	20.1645	-1.28289
17	2010-09-24	0	65	1	0	0	0	0	0	0	2010-10-15	21.4474	20.7566	-0.69079
17	2010-09-28	0	47	1	1	1	1	0	0	0	2010-10-15	21.4474	20.8882	-0.55921
17	2010-09-24	0	75	1	1	1	1	0	0	0	2010-10-15	21.4474	20.7566	-0.69079
17	2010-09-15	1	70	1	0	0	0	0	0	0	2010-10-15	21.4474	20.4605	-0.986843
17	2010-09-20	0	22	1	0	0	0	0	0	0	2010-10-15	21.4474	20.625	-0.822369
17	2010-09-13	1	65	1	1	1	1	0	0	0	2010-10-15	21.4474	20.3947	-1.05263
17	2010-09-24	1	50	1	0	0	0	0	0	0	2010-10-15	21.4474	20.7566	-0.69079
17	2010-09-28	0	20	1	1	1	1	0	0	0	2010-10-15	21.4474	20.8882	-0.55921
17	2010-09-24	1	63	1	0	0	0	0	0	0	2010-10-15	21.4474	20.7566	-0.69079
17	2010-09-16	1	20	1	0	0	0	0	0	0	2010-10-15	21.4474	20.4934	-0.953947
17	2010-09-27	1	63	1	0	0	0	0	0	0	2010-10-15	21.4474	20.8553	-0.592106
17	2010-09-21	1	28	1	1	1	1	0	0	0	2010-10-15	21.4474	20.6579	-0.789474
17	2010-09-30	1	61	1	1	1	1	0	0	0	2010-10-15	21.4474	20.9539	-0.493422
17	2010-09-03	0	78	1	0	0	0	0	0	0	2010-10-15	21.4474	20.0658	-1.38158
17	2010-09-28	0	65	1	1	1	1	0	0	0	2010-10-15	21.4474	20.8882	-0.55921
17	2010-09-13	0	69	1	1	1	1	0	0	0	2010-10-15	21.4474	20.3947	-1.05263
17	2010-09-16	0	17	1	0	0	0	0	0	0	2010-10-15	21.4474	20.4934	-0.953947
19	2010-09-27	1	35	1	0	0	0	0	0	1	2010-09-15	20.4605	20.8553	0.394737
19	2010-09-29	0	70	1	1	1	1	0	0	1	2010-09-15	20.4605	20.9211	0.460527
19	2010-09-06	1	25	1	1	1	1	0	0	0	2010-09-15	20.4605	20.1645	-0.296051
19	2010-09-16	0	17	1	1	1	1	0	0	1	2010-09-15	20.4605	20.4934	0.032896
19	2010-09-07	1	52	1	1	1	1	0	0	0	2010-09-15	20.4605	20.1974	-0.263157
19	2010-09-03	1	35	1	0	0	0	0	0	0	2010-09-15	20.4605	20.0658	-0.394735
19	2010-09-01	0	24	1	0	1	0	0	0	0	2010-09-15	20.4605	20	-0.460525
19	2010-09-27	0	36	1	0	1	0	0	0	1	2010-09-15	20.4605	20.8553	0.394737
19	2010-09-07	1	58	1	1	1	1	0	0	0	2010-09-15	20.4605	20.1974	-0.263157
19	2010-09-29	1	40	1	0	1	0	0	0	1	2010-09-15	20.4605	20.9211	0.460527
19	2010-09-07	0	88	1	0	1	0	0	0	0	2010-09-15	20.4605	20.1974	-0.263157
19	2010-09-03	0	50	1	0	1	0	0	0	0	2010-09-15	20.4605	20.0658	-0.394735
19	2010-09-02	0	39	1	0	0	0	0	0	0	2010-09-15	20.4605	20.0329	-0.427631
19	2010-09-03	1	64	1	1	1	1	0	0	0	2010-09-15	20.4605	20.0658	-0.394735
19	2010-09-16	1	52	1	0	0	0	0	0	1	2010-09-15	20.4605	20.4934	0.032896
19	2010-09-21	0	38	1	0	0	0	0	0	1	2010-09-15	20.4605	20.6579	0.197369
19	2010-09-16	0	38	1	0	0	0	0	0	1	2010-09-15	20.4605	20.4934	0.032896
19	2010-09-30	0	46	1	0	1	0	0	0	1	2010-09-15	20.4605	20.9539	0.493422
19	2010-09-01	1	32	1	0	0	0	0	0	0	2010-09-15	20.4605	20	-0.460525
19	2010-09-09	1	60	1	0	1	0	0	0	0	2010-09-15	20.4605	20.2632	-0.197367
19	2010-09-29	1	45	1	1	1	1	0	0	1	2010-09-15	20.4605	20.9211	0.460527
19	2010-09-14	1	70	1	1	1	1	0	0	0	2010-09-15	20.4605	20.4276	-0.0328941
19	2010-09-29	0	70	1	0	0	0	0	0	1	2010-09-15	20.4605	20.9211	0.460527
19	2010-09-22	1	22	1	0	0	0	0	0	1	2010-09-15	20.4605	20.6908	0.230265
20	2010-09-13	1	28	1	0	1	0	0	0	0	2010-12-15	23.4539	20.3947	-3.05921
20	2010-09-09	0	25	1	1	1	1	0	0	0	2010-12-15	23.4539	20.2632	-3.19079
20	2010-09-27	0	38	1	1	1	1	0	0	0	2010-12-15	23.4539	20.8553	-2.59868
20	2010-09-27	1	38	1	0	1	0	0	0	0	2010-12-15	23.4539	20.8553	-2.59868
20	2010-09-09	0	60	1	0	1	0	0	0	0	2010-12-15	23.4539	20.2632	-3.19079
20	2010-09-22	0	37	1	1	1	1	0	0	0	2010-12-15	23.4539	20.6908	-2.76316
20	2010-09-17	0	45	1	1	1	1	0	0	0	2010-12-15	23.4539	20.5263	-2.92763
20	2010-09-27	1	18	1	0	0	0	0	0	0	2010-12-15	23.4539	20.8553	-2.59868
20	2010-09-04	1	28	1	0	0	0	0	0	0	2010-12-15	23.4539	20.0987	-3.35526
20	2010-09-17	1	37	1	0	1	0	0	0	0	2010-12-15	23.4539	20.5263	-2.92763
20	2010-09-16	1	35	1	1	1	1	0	0	0	2010-12-15	23.4539	20.4934	-2.96053
20	2010-09-09	1	40	1	0	1	0	0	0	0	2010-12-15	23.4539	20.2632	-3.19079
11	2010-10-28	1	32	1	1	1	1	0	0	1	2010-08-15	19.4408	21.875	2.43421
11	2010-10-19	1	15	1	1	1	1	0	0	1	2010-08-15	19.4408	21.5789	2.13816
11	2010-10-19	0	20	1	1	1	1	0	0	1	2010-08-15	19.4408	21.5789	2.13816
11	2010-10-15	0	57	1	1	1	1	0	0	1	2010-08-15	19.4408	21.4474	2.00658
11	2010-10-20	1	26	1	1	1	1	0	0	1	2010-08-15	19.4408	21.6118	2.17105
11	2010-10-29	1	60	1	1	1	1	0	0	1	2010-08-15	19.4408	21.9079	2.4671
11	2010-10-21	1	50	1	1	1	1	0	0	1	2010-08-15	19.4408	21.6447	2.20395
11	2010-10-27	0	30	1	1	1	1	1	1	1	2010-08-15	19.4408	21.8421	2.40132
11	2010-10-19	1	50	1	1	1	1	0	0	1	2010-08-15	19.4408	21.5789	2.13816
11	2010-10-28	0	26	1	1	1	1	1	1	1	2010-08-15	19.4408	21.875	2.43421
11	2010-10-12	0	30	1	1	1	1	0	0	1	2010-08-15	19.4408	21.3487	1.90789
11	2010-10-27	0	42	1	1	1	1	0	0	1	2010-08-15	19.4408	21.8421	2.40132
11	2010-10-21	0	40	1	1	1	1	0	0	1	2010-08-15	19.4408	21.6447	2.20395
15	2010-10-26	1	45	1	1	1	1	0	0	1	2010-08-15	19.4408	21.8092	2.36842
15	2010-10-14	0	45	1	0	1	1	0	1	1	2010-08-15	19.4408	21.4145	1.97368
16	2010-10-19	0	27	1	0	1	0	0	0	1	2010-09-15	20.4605	21.5789	1.11842
16	2010-10-14	1	43	1	1	1	1	0	0	1	2010-09-15	20.4605	21.4145	0.953949
16	2010-10-06	0	37	1	0	1	0	0	0	1	2010-09-15	20.4605	21.1513	0.69079
16	2010-10-20	0	31	1	1	1	1	1	1	1	2010-09-15	20.4605	21.6118	1.15132
16	2010-10-07	0	45	1	1	1	1	1	1	1	2010-09-15	20.4605	21.1842	0.723684
16	2010-10-13	1	53	1	1	1	1	0	0	1	2010-09-15	20.4605	21.3816	0.921053
16	2010-10-26	1	23	1	1	1	1	0	0	1	2010-09-15	20.4605	21.8092	1.34868
16	2010-10-01	0	48	1	1	1	1	1	1	1	2010-09-15	20.4605	20.9868	0.526316
16	2010-10-06	1	30	1	1	1	1	1	1	1	2010-09-15	20.4605	21.1513	0.69079
16	2010-10-13	1	22	1	1	1	1	0	0	1	2010-09-15	20.4605	21.3816	0.921053
16	2010-10-21	1	36	1	0	1	0	0	0	1	2010-09-15	20.4605	21.6447	1.18421
16	2010-10-26	0	43	1	1	1	1	0	0	1	2010-09-15	20.4605	21.8092	1.34868
16	2010-10-20	0	55	1	1	1	1	0	0	1	2010-09-15	20.4605	21.6118	1.15132
16	2010-10-27	1	16	1	1	1	1	0	0	1	2010-09-15	20.4605	21.8421	1.38158
16	2010-10-15	0	60	1	0	1	0	0	0	1	2010-09-15	20.4605	21.4474	0.986843
16	2010-10-04	1	35	1	1	1	1	1	1	1	2010-09-15	20.4605	21.0855	0.625
16	2010-10-14	0	32	1	1	1	1	0	0	1	2010-09-15	20.4605	21.4145	0.953949
16	2010-10-27	1	43	1	1	1	1	0	0	1	2010-09-15	20.4605	21.8421	1.38158
17	2010-10-15	1	80	1	1	1	1	0	0	0	2010-10-15	21.4474	21.4474	0
17	2010-10-19	1	70	1	1	1	1	0	0	1	2010-10-15	21.4474	21.5789	0.131578
17	2010-10-06	1	24	1	0	0	0	0	0	0	2010-10-15	21.4474	21.1513	-0.296053
17	2010-10-29	0	62	1	0	1	0	0	0	1	2010-10-15	21.4474	21.9079	0.460525
17	2010-10-08	0	27	1	1	1	1	1	1	0	2010-10-15	21.4474	21.2171	-0.230263
17	2010-10-06	1	28	1	0	0	0	0	0	0	2010-10-15	21.4474	21.1513	-0.296053
17	2010-10-24	0	33	1	0	1	0	0	0	1	2010-10-15	21.4474	21.7434	0.296053
17	2010-10-04	1	15	1	0	0	0	0	0	0	2010-10-15	21.4474	21.0855	-0.361843
17	2010-10-05	0	16	1	1	1	1	0	0	0	2010-10-15	21.4474	21.1184	-0.328947
17	2010-10-13	0	54	1	1	1	1	0	0	0	2010-10-15	21.4474	21.3816	-0.0657902
17	2010-10-29	0	31	1	0	1	0	0	0	1	2010-10-15	21.4474	21.9079	0.460525
17	2010-10-05	0	70	1	0	0	0	0	0	0	2010-10-15	21.4474	21.1184	-0.328947
17	2010-10-18	0	40	1	0	0	0	0	0	1	2010-10-15	21.4474	21.5461	0.0986843
17	2010-10-05	1	45	1	1	1	1	0	0	0	2010-10-15	21.4474	21.1184	-0.328947
17	2010-10-04	1	23	1	1	1	1	0	0	0	2010-10-15	21.4474	21.0855	-0.361843
17	2010-10-08	1	70	1	0	1	0	0	0	0	2010-10-15	21.4474	21.2171	-0.230263
17	2010-10-08	0	27	1	0	1	0	0	0	0	2010-10-15	21.4474	21.2171	-0.230263
19	2010-10-12	1	50	1	1	1	1	0	0	1	2010-09-15	20.4605	21.3487	0.888159
19	2010-10-03	0	26	1	0	0	0	0	0	1	2010-09-15	20.4605	21.0526	0.592106
19	2010-10-21	1	18	1	0	1	1	0	1	1	2010-09-15	20.4605	21.6447	1.18421
19	2010-10-05	1	31	1	1	1	1	0	0	1	2010-09-15	20.4605	21.1184	0.657896
19	2010-10-11	1	60	1	0	0	0	0	0	1	2010-09-15	20.4605	21.3158	0.855265
19	2010-10-01	1	16	1	0	0	0	0	0	1	2010-09-15	20.4605	20.9868	0.526316
19	2010-10-19	0	44	1	0	0	0	0	0	1	2010-09-15	20.4605	21.5789	1.11842
19	2010-10-07	0	54	1	0	1	1	0	1	1	2010-09-15	20.4605	21.1842	0.723684
19	2010-10-26	1	23	1	1	1	1	0	0	1	2010-09-15	20.4605	21.8092	1.34868
19	2010-10-12	0	75	1	1	1	1	0	0	1	2010-09-15	20.4605	21.3487	0.888159
19	2010-10-19	0	67	1	1	1	1	0	0	1	2010-09-15	20.4605	21.5789	1.11842
19	2010-10-11	1	39	1	0	0	0	0	0	1	2010-09-15	20.4605	21.3158	0.855265
19	2010-10-14	1	47	1	0	0	0	0	0	1	2010-09-15	20.4605	21.4145	0.953949
19	2010-10-21	0	42	1	0	1	1	0	1	1	2010-09-15	20.4605	21.6447	1.18421
19	2010-10-03	1	72	1	0	0	0	0	0	1	2010-09-15	20.4605	21.0526	0.592106
19	2010-10-12	1	17	1	1	1	1	0	0	1	2010-09-15	20.4605	21.3487	0.888159
19	2010-10-03	1	21	1	0	0	0	0	0	1	2010-09-15	20.4605	21.0526	0.592106
19	2010-10-05	0	16	1	0	0	0	0	0	1	2010-09-15	20.4605	21.1184	0.657896
19	2010-10-18	1	16	1	0	0	0	0	0	1	2010-09-15	20.4605	21.5461	1.08553
19	2010-10-27	1	60	1	0	0	0	0	0	1	2010-09-15	20.4605	21.8421	1.38158
19	2010-10-12	0	38	1	1	1	1	0	0	1	2010-09-15	20.4605	21.3487	0.888159
19	2010-10-25	0	50	1	0	0	0	0	0	1	2010-09-15	20.4605	21.7763	1.31579
19	2010-10-25	0	41	1	1	1	1	1	1	1	2010-09-15	20.4605	21.7763	1.31579
19	2010-10-05	1	36	1	0	0	0	0	0	1	2010-09-15	20.4605	21.1184	0.657896
19	2010-10-06	1	17	1	1	1	1	0	0	1	2010-09-15	20.4605	21.1513	0.69079
19	2010-10-22	1	27	1	1	1	1	0	0	1	2010-09-15	20.4605	21.6776	1.21711
19	2010-10-19	0	36	1	1	1	1	0	0	1	2010-09-15	20.4605	21.5789	1.11842
20	2010-10-15	1	22	1	0	0	0	0	0	0	2010-12-15	23.4539	21.4474	-2.00658
20	2010-10-11	1	21	1	0	0	0	0	0	0	2010-12-15	23.4539	21.3158	-2.13816
20	2010-10-20	0	17	1	1	1	1	1	1	0	2010-12-15	23.4539	21.6118	-1.84211
20	2010-10-07	1	24	1	0	0	0	0	0	0	2010-12-15	23.4539	21.1842	-2.26974
20	2010-10-13	1	18	1	0	0	0	0	0	0	2010-12-15	23.4539	21.3816	-2.07237
20	2010-10-21	1	35	1	0	0	0	0	0	0	2010-12-15	23.4539	21.6447	-1.80921
20	2010-10-13	0	30	1	0	1	1	0	1	0	2010-12-15	23.4539	21.3816	-2.07237
20	2010-10-12	1	30	1	0	0	0	0	0	0	2010-12-15	23.4539	21.3487	-2.10526
20	2010-10-14	0	41	1	1	1	1	0	0	0	2010-12-15	23.4539	21.4145	-2.03947
20	2010-10-29	0	60	1	1	1	1	0	0	0	2010-12-15	23.4539	21.9079	-1.54605
20	2010-10-13	0	80	1	0	0	0	0	0	0	2010-12-15	23.4539	21.3816	-2.07237
20	2010-10-26	0	24	1	0	0	0	0	0	0	2010-12-15	23.4539	21.8092	-1.64474
20	2010-10-13	0	30	1	1	1	1	0	0	0	2010-12-15	23.4539	21.3816	-2.07237
20	2010-10-25	1	40	1	1	1	1	0	0	0	2010-12-15	23.4539	21.7763	-1.67763
20	2010-10-15	1	15	1	0	0	0	0	0	0	2010-12-15	23.4539	21.4474	-2.00658
20	2010-10-28	0	35	1	1	1	1	0	0	0	2010-12-15	23.4539	21.875	-1.57895
20	2010-10-08	1	40	1	1	1	1	0	0	0	2010-12-15	23.4539	21.2171	-2.23684
20	2010-10-07	0	17	1	1	1	1	0	0	0	2010-12-15	23.4539	21.1842	-2.26974
20	2010-10-18	1	34	1	0	0	0	0	0	0	2010-12-15	23.4539	21.5461	-1.90789
20	2010-10-15	1	22	1	1	1	1	0	0	0	2010-12-15	23.4539	21.4474	-2.00658
20	2010-10-15	1	20	1	0	0	0	0	0	0	2010-12-15	23.4539	21.4474	-2.00658
20	2010-10-14	0	48	1	0	0	0	0	0	0	2010-12-15	23.4539	21.4145	-2.03947
20	2010-10-22	1	20	1	1	1	1	0	0	0	2010-12-15	23.4539	21.6776	-1.77632
20	2010-10-01	0	35	1	0	0	0	0	0	0	2010-12-15	23.4539	20.9868	-2.46711
20	2010-10-28	1	43	1	1	1	1	0	0	0	2010-12-15	23.4539	21.875	-1.57895
20	2010-10-19	1	22	1	1	1	1	0	0	0	2010-12-15	23.4539	21.5789	-1.875
20	2010-10-20	0	22	1	1	1	1	0	0	0	2010-12-15	23.4539	21.6118	-1.84211
20	2010-10-14	1	76	1	0	0	0	0	0	0	2010-12-15	23.4539	21.4145	-2.03947
20	2010-10-23	1	40	1	1	1	1	0	0	0	2010-12-15	23.4539	21.7105	-1.74342
20	2010-10-22	1	42	1	1	1	1	0	0	0	2010-12-15	23.4539	21.6776	-1.77632
20	2010-10-20	1	46	1	0	0	0	0	0	0	2010-12-15	23.4539	21.6118	-1.84211
20	2010-10-28	1	23	1	0	1	0	0	0	0	2010-12-15	23.4539	21.875	-1.57895
20	2010-10-11	0	40	1	1	1	1	0	0	0	2010-12-15	23.4539	21.3158	-2.13816
20	2010-10-01	0	45	1	1	1	1	0	0	0	2010-12-15	23.4539	20.9868	-2.46711
11	2010-11-12	0	29	1	1	1	1	0	0	1	2010-08-15	19.4408	22.3684	2.92763
11	2010-11-02	1	45	1	1	1	1	0	0	1	2010-08-15	19.4408	22.0395	2.59868
11	2010-11-19	1	17	1	1	1	1	0	0	1	2010-08-15	19.4408	22.5987	3.15789
11	2010-11-13	1	37	1	1	1	1	0	0	1	2010-08-15	19.4408	22.4013	2.96053
11	2010-11-19	1	20	1	0	1	0	0	0	1	2010-08-15	19.4408	22.5987	3.15789
11	2010-11-17	0	17	1	1	1	1	0	0	1	2010-08-15	19.4408	22.5329	3.0921
11	2010-11-02	0	40	1	1	1	1	0	0	1	2010-08-15	19.4408	22.0395	2.59868
11	2010-11-12	0	48	1	1	1	1	0	0	1	2010-08-15	19.4408	22.3684	2.92763
11	2010-11-09	0	48	1	1	1	1	0	0	1	2010-08-15	19.4408	22.2697	2.82895
11	2010-11-19	1	50	1	1	1	1	0	0	1	2010-08-15	19.4408	22.5987	3.15789
11	2010-11-08	1	43	1	0	1	0	0	0	1	2010-08-15	19.4408	22.2368	2.79605
11	2010-11-08	1	40	1	1	1	1	0	0	1	2010-08-15	19.4408	22.2368	2.79605
11	2010-11-04	1	65	1	1	1	1	0	0	1	2010-08-15	19.4408	22.1053	2.66447
11	2010-11-03	0	40	1	0	1	0	0	0	1	2010-08-15	19.4408	22.0724	2.63158
11	2010-11-11	0	40	1	1	1	1	0	0	1	2010-08-15	19.4408	22.3355	2.89473
11	2010-11-12	1	35	1	1	1	1	0	0	1	2010-08-15	19.4408	22.3684	2.92763
11	2010-11-24	0	32	1	1	1	1	0	0	1	2010-08-15	19.4408	22.7632	3.32237
11	2010-11-18	1	70	1	1	1	1	0	0	1	2010-08-15	19.4408	22.5658	3.125
11	2010-11-01	0	45	1	1	1	1	1	1	1	2010-08-15	19.4408	22.0066	2.56579
11	2010-11-29	1	21	1	1	1	1	0	0	1	2010-08-15	19.4408	22.9276	3.48684
11	2010-11-25	1	27	1	1	1	1	0	0	1	2010-08-15	19.4408	22.7961	3.35526
11	2010-11-02	0	28	1	1	1	1	0	0	1	2010-08-15	19.4408	22.0395	2.59868
11	2010-11-01	1	53	1	1	1	1	0	0	1	2010-08-15	19.4408	22.0066	2.56579
11	2010-11-01	0	39	1	1	1	1	0	0	1	2010-08-15	19.4408	22.0066	2.56579
11	2010-11-26	1	50	1	1	1	1	0	0	1	2010-08-15	19.4408	22.8289	3.38816
11	2010-11-23	1	45	1	1	1	1	0	0	1	2010-08-15	19.4408	22.7303	3.28947
15	2010-11-22	0	45	1	1	1	1	0	0	1	2010-08-15	19.4408	22.6974	3.25658
15	2010-11-22	0	45	1	1	1	1	1	1	1	2010-08-15	19.4408	22.6974	3.25658
15	2010-11-29	1	20	1	0	1	0	0	0	1	2010-08-15	19.4408	22.9276	3.48684
15	2010-11-04	0	22	1	0	0	0	0	0	1	2010-08-15	19.4408	22.1053	2.66447
15	2010-11-25	0	50	1	0	1	0	0	0	1	2010-08-15	19.4408	22.7961	3.35526
15	2010-11-23	0	45	1	1	1	1	1	1	1	2010-08-15	19.4408	22.7303	3.28947
15	2010-11-17	0	55	1	1	1	1	0	0	1	2010-08-15	19.4408	22.5329	3.0921
15	2010-11-08	0	70	1	1	1	1	1	1	1	2010-08-15	19.4408	22.2368	2.79605
15	2010-11-16	0	31	1	1	1	1	0	0	1	2010-08-15	19.4408	22.5	3.05921
15	2010-11-09	1	45	1	1	1	1	0	0	1	2010-08-15	19.4408	22.2697	2.82895
15	2010-11-22	1	39	1	1	1	1	0	0	1	2010-08-15	19.4408	22.6974	3.25658
15	2010-11-02	1	24	1	1	1	1	0	0	1	2010-08-15	19.4408	22.0395	2.59868
15	2010-11-26	1	38	1	1	1	1	0	0	1	2010-08-15	19.4408	22.8289	3.38816
15	2010-11-15	0	40	1	1	1	1	0	0	1	2010-08-15	19.4408	22.4671	3.02632
15	2010-11-18	1	28	1	0	1	0	0	0	1	2010-08-15	19.4408	22.5658	3.125
16	2010-11-11	1	32	1	1	1	1	0	0	1	2010-09-15	20.4605	22.3355	1.875
16	2010-11-08	0	42	1	1	1	1	0	0	1	2010-09-15	20.4605	22.2368	1.77632
16	2010-11-11	1	24	1	1	1	1	0	0	1	2010-09-15	20.4605	22.3355	1.875
16	2010-11-26	0	46	1	1	1	1	0	0	1	2010-09-15	20.4605	22.8289	2.36842
16	2010-11-15	1	40	1	0	0	0	0	0	1	2010-09-15	20.4605	22.4671	2.00658
16	2010-11-01	0	25	1	1	1	1	0	0	1	2010-09-15	20.4605	22.0066	1.54605
16	2010-11-04	0	18	1	1	1	1	0	0	1	2010-09-15	20.4605	22.1053	1.64474
16	2010-11-17	0	61	1	1	1	1	0	0	1	2010-09-15	20.4605	22.5329	2.07237
16	2010-11-25	0	20	1	1	1	1	1	1	1	2010-09-15	20.4605	22.7961	2.33553
16	2010-11-09	1	35	1	1	1	1	0	0	1	2010-09-15	20.4605	22.2697	1.80921
16	2010-11-02	1	23	1	1	1	1	1	1	1	2010-09-15	20.4605	22.0395	1.57895
16	2010-11-08	0	31	1	1	1	1	0	0	1	2010-09-15	20.4605	22.2368	1.77632
16	2010-11-01	0	60	1	0	1	0	0	0	1	2010-09-15	20.4605	22.0066	1.54605
16	2010-11-17	1	68	1	1	1	1	0	0	1	2010-09-15	20.4605	22.5329	2.07237
16	2010-11-04	0	25	1	1	1	1	0	0	1	2010-09-15	20.4605	22.1053	1.64474
16	2010-11-26	0	59	1	1	1	1	0	0	1	2010-09-15	20.4605	22.8289	2.36842
16	2010-11-15	1	16	1	0	0	0	0	0	1	2010-09-15	20.4605	22.4671	2.00658
16	2010-11-23	0	45	1	1	1	1	0	0	1	2010-09-15	20.4605	22.7303	2.26974
16	2010-11-15	1	23	1	1	1	1	0	0	1	2010-09-15	20.4605	22.4671	2.00658
16	2010-11-23	1	22	1	0	1	0	0	0	1	2010-09-15	20.4605	22.7303	2.26974
16	2010-11-08	0	49	1	1	1	1	0	0	1	2010-09-15	20.4605	22.2368	1.77632
16	2010-11-15	0	15	1	0	0	0	0	0	1	2010-09-15	20.4605	22.4671	2.00658
17	2010-11-17	0	69	1	1	1	1	0	0	1	2010-10-15	21.4474	22.5329	1.08553
17	2010-11-19	1	17	1	1	1	1	0	0	1	2010-10-15	21.4474	22.5987	1.15132
17	2010-11-12	1	27	1	1	1	1	0	0	1	2010-10-15	21.4474	22.3684	0.921053
17	2010-11-01	0	36	1	1	1	1	0	0	1	2010-10-15	21.4474	22.0066	0.55921
17	2010-11-18	1	32	1	0	0	0	0	0	1	2010-10-15	21.4474	22.5658	1.11842
17	2010-11-15	1	45	1	1	1	1	1	1	1	2010-10-15	21.4474	22.4671	1.01974
17	2010-11-08	0	16	1	1	1	1	0	0	1	2010-10-15	21.4474	22.2368	0.789473
17	2010-11-20	0	27	1	1	1	1	0	0	1	2010-10-15	21.4474	22.6316	1.18421
17	2010-11-22	0	65	1	1	1	1	0	0	1	2010-10-15	21.4474	22.6974	1.25
17	2010-11-19	1	32	1	1	1	1	0	0	1	2010-10-15	21.4474	22.5987	1.15132
17	2010-11-04	0	38	1	1	1	1	0	0	1	2010-10-15	21.4474	22.1053	0.657894
17	2010-11-17	0	46	1	1	1	1	0	0	1	2010-10-15	21.4474	22.5329	1.08553
17	2010-11-08	1	15	1	1	1	1	0	0	1	2010-10-15	21.4474	22.2368	0.789473
17	2010-11-23	0	33	1	1	1	1	0	0	1	2010-10-15	21.4474	22.7303	1.28289
17	2010-11-04	1	38	1	1	1	1	0	0	1	2010-10-15	21.4474	22.1053	0.657894
17	2010-11-24	0	48	1	1	1	1	0	0	1	2010-10-15	21.4474	22.7632	1.31579
17	2010-11-15	1	70	1	1	1	1	0	0	1	2010-10-15	21.4474	22.4671	1.01974
19	2010-11-01	1	44	1	1	1	1	0	0	1	2010-09-15	20.4605	22.0066	1.54605
19	2010-11-17	1	75	1	0	0	0	0	0	1	2010-09-15	20.4605	22.5329	2.07237
19	2010-11-26	0	40	1	0	0	0	0	0	1	2010-09-15	20.4605	22.8289	2.36842
19	2010-11-12	0	86	1	0	0	0	0	0	1	2010-09-15	20.4605	22.3684	1.9079
19	2010-11-25	1	70	1	1	1	1	0	0	1	2010-09-15	20.4605	22.7961	2.33553
19	2010-11-18	0	38	1	1	1	1	0	0	1	2010-09-15	20.4605	22.5658	2.10527
19	2010-11-02	1	40	1	0	1	0	0	0	1	2010-09-15	20.4605	22.0395	1.57895
19	2010-11-02	1	50	1	0	0	0	0	0	1	2010-09-15	20.4605	22.0395	1.57895
19	2010-11-23	1	23	1	1	1	1	0	0	1	2010-09-15	20.4605	22.7303	2.26974
19	2010-11-09	1	57	1	1	1	1	0	0	1	2010-09-15	20.4605	22.2697	1.80921
19	2010-11-29	1	30	1	0	0	0	0	0	1	2010-09-15	20.4605	22.9276	2.46711
19	2010-11-04	0	73	1	0	1	0	0	0	1	2010-09-15	20.4605	22.1053	1.64474
19	2010-11-24	1	37	1	0	0	0	0	0	1	2010-09-15	20.4605	22.7632	2.30263
19	2010-11-01	1	37	1	1	1	1	0	0	1	2010-09-15	20.4605	22.0066	1.54605
19	2010-11-22	0	66	1	1	1	1	0	0	1	2010-09-15	20.4605	22.6974	2.23684
19	2010-11-16	1	45	1	0	1	0	0	0	1	2010-09-15	20.4605	22.5	2.03947
19	2010-11-25	1	18	1	0	1	0	0	0	1	2010-09-15	20.4605	22.7961	2.33553
19	2010-11-09	1	26	1	1	1	1	0	0	1	2010-09-15	20.4605	22.2697	1.80921
20	2010-11-26	0	21	1	0	1	0	0	0	0	2010-12-15	23.4539	22.8289	-0.625
20	2010-11-08	0	57	1	0	1	0	0	0	0	2010-12-15	23.4539	22.2368	-1.21711
20	2010-11-08	0	29	1	0	1	0	0	0	0	2010-12-15	23.4539	22.2368	-1.21711
20	2010-11-17	0	22	1	1	1	1	0	0	0	2010-12-15	23.4539	22.5329	-0.921053
20	2010-11-22	1	26	1	0	1	0	0	0	0	2010-12-15	23.4539	22.6974	-0.756578
20	2010-11-29	1	29	1	0	1	0	0	0	0	2010-12-15	23.4539	22.9276	-0.526316
20	2010-11-29	1	56	1	1	1	1	0	0	0	2010-12-15	23.4539	22.9276	-0.526316
20	2010-11-04	1	46	1	0	0	0	1	0	0	2010-12-15	23.4539	22.1053	-1.34868
20	2010-11-04	1	32	1	0	0	0	0	0	0	2010-12-15	23.4539	22.1053	-1.34868
20	2010-11-24	0	52	1	0	1	1	0	1	0	2010-12-15	23.4539	22.7632	-0.690788
20	2010-11-01	0	39	1	0	1	0	0	0	0	2010-12-15	23.4539	22.0066	-1.44737
20	2010-11-29	0	17	1	1	1	1	0	0	0	2010-12-15	23.4539	22.9276	-0.526316
20	2010-11-29	0	31	1	1	1	1	0	0	0	2010-12-15	23.4539	22.9276	-0.526316
20	2010-11-15	0	21	1	0	0	0	0	0	0	2010-12-15	23.4539	22.4671	-0.986841
20	2010-11-24	0	23	1	0	1	1	0	1	0	2010-12-15	23.4539	22.7632	-0.690788
20	2010-11-22	0	37	1	0	1	0	0	0	0	2010-12-15	23.4539	22.6974	-0.756578
20	2010-11-17	0	50	1	1	1	1	0	0	0	2010-12-15	23.4539	22.5329	-0.921053
20	2010-11-03	0	35	1	0	0	0	0	0	0	2010-12-15	23.4539	22.0724	-1.38158
20	2010-11-30	1	24	1	0	0	0	0	0	0	2010-12-15	23.4539	22.9605	-0.493422
11	2010-12-23	0	78	1	1	1	1	0	0	1	2010-08-15	19.4408	23.7171	4.27632
11	2010-12-23	0	23	1	1	1	1	0	0	1	2010-08-15	19.4408	23.7171	4.27632
11	2010-12-03	0	63	1	0	1	1	0	1	1	2010-08-15	19.4408	23.0592	3.61842
11	2010-12-06	1	19	1	1	1	1	0	0	1	2010-08-15	19.4408	23.1579	3.7171
11	2010-12-29	0	52	1	1	1	1	0	0	1	2010-08-15	19.4408	23.9145	4.47368
11	2010-12-29	0	22	1	1	1	1	0	0	1	2010-08-15	19.4408	23.9145	4.47368
11	2010-12-27	1	25	1	0	1	0	0	0	1	2010-08-15	19.4408	23.8487	4.40789
11	2010-12-03	0	22	1	0	1	1	0	1	1	2010-08-15	19.4408	23.0592	3.61842
11	2010-12-06	1	29	1	1	1	1	1	1	1	2010-08-15	19.4408	23.1579	3.7171
11	2010-12-17	0	37	1	1	1	1	1	0	1	2010-08-15	19.4408	23.5197	4.07895
11	2010-12-21	0	35	1	1	1	1	0	0	1	2010-08-15	19.4408	23.6513	4.21053
11	2010-12-23	0	81	1	1	1	1	0	0	1	2010-08-15	19.4408	23.7171	4.27632
11	2010-12-23	0	42	1	1	1	1	1	0	1	2010-08-15	19.4408	23.7171	4.27632
11	2010-12-23	1	22	1	0	1	0	0	0	1	2010-08-15	19.4408	23.7171	4.27632
11	2010-12-15	0	58	1	1	1	1	0	0	1	2010-08-15	19.4408	23.4539	4.01316
11	2010-12-03	1	45	1	1	1	1	1	1	1	2010-08-15	19.4408	23.0592	3.61842
15	2010-12-21	1	20	1	1	1	1	0	0	1	2010-08-15	19.4408	23.6513	4.21053
15	2010-12-30	0	50	1	1	1	1	0	0	1	2010-08-15	19.4408	23.9474	4.50658
15	2010-12-02	0	58	1	1	1	1	0	0	1	2010-08-15	19.4408	23.0263	3.58553
15	2010-12-22	0	24	1	1	1	1	1	1	1	2010-08-15	19.4408	23.6842	4.24342
15	2010-12-21	1	30	1	1	1	1	0	0	1	2010-08-15	19.4408	23.6513	4.21053
15	2010-12-06	0	30	1	0	0	0	0	0	1	2010-08-15	19.4408	23.1579	3.7171
15	2010-12-22	1	23	1	1	1	1	0	0	1	2010-08-15	19.4408	23.6842	4.24342
15	2010-12-21	1	32	1	1	1	1	1	1	1	2010-08-15	19.4408	23.6513	4.21053
15	2010-12-13	0	19	1	1	1	1	0	0	1	2010-08-15	19.4408	23.3882	3.94737
15	2010-12-10	0	60	1	1	1	1	1	1	1	2010-08-15	19.4408	23.2895	3.84868
16	2010-12-23	0	17	1	1	1	1	0	0	1	2010-09-15	20.4605	23.7171	3.25658
16	2010-12-15	0	42	1	1	1	1	0	0	1	2010-09-15	20.4605	23.4539	2.99342
16	2010-12-15	0	27	1	1	1	1	0	0	1	2010-09-15	20.4605	23.4539	2.99342
16	2010-12-15	0	21	1	1	1	1	0	0	1	2010-09-15	20.4605	23.4539	2.99342
16	2010-12-21	1	71	1	1	1	1	0	0	1	2010-09-15	20.4605	23.6513	3.19079
16	2010-12-15	0	39	1	1	1	1	0	0	1	2010-09-15	20.4605	23.4539	2.99342
16	2010-12-23	0	42	1	1	1	1	1	1	1	2010-09-15	20.4605	23.7171	3.25658
16	2010-12-10	1	32	1	1	1	1	0	0	1	2010-09-15	20.4605	23.2895	2.82895
16	2010-12-15	0	53	1	1	1	1	0	0	1	2010-09-15	20.4605	23.4539	2.99342
16	2010-12-01	0	75	1	1	1	1	0	0	1	2010-09-15	20.4605	22.9934	2.5329
16	2010-12-15	0	22	1	1	1	1	0	0	1	2010-09-15	20.4605	23.4539	2.99342
16	2010-12-01	1	44	1	1	1	1	0	0	1	2010-09-15	20.4605	22.9934	2.5329
16	2010-12-15	0	26	1	1	1	1	0	0	1	2010-09-15	20.4605	23.4539	2.99342
16	2010-12-30	0	23	1	1	1	1	1	1	1	2010-09-15	20.4605	23.9474	3.48684
16	2010-12-09	1	30	1	1	1	1	0	0	1	2010-09-15	20.4605	23.2566	2.79605
16	2010-12-01	0	22	1	1	1	1	1	1	1	2010-09-15	20.4605	22.9934	2.5329
16	2010-12-16	0	55	1	1	1	1	1	1	1	2010-09-15	20.4605	23.4868	3.02632
16	2010-12-30	0	22	1	1	1	1	0	0	1	2010-09-15	20.4605	23.9474	3.48684
16	2010-12-03	1	21	1	1	1	1	0	0	1	2010-09-15	20.4605	23.0592	2.59868
16	2010-12-08	0	51	1	1	1	1	0	0	1	2010-09-15	20.4605	23.2237	2.76316
16	2010-12-15	0	39	1	1	1	1	0	0	1	2010-09-15	20.4605	23.4539	2.99342
16	2010-12-10	0	36	1	1	1	1	0	0	1	2010-09-15	20.4605	23.2895	2.82895
16	2010-12-15	0	33	1	1	1	1	1	1	1	2010-09-15	20.4605	23.4539	2.99342
16	2010-12-29	1	33	1	1	1	1	0	0	1	2010-09-15	20.4605	23.9145	3.45395
16	2010-12-15	0	19	1	1	1	1	0	0	1	2010-09-15	20.4605	23.4539	2.99342
16	2010-12-15	0	20	1	1	1	1	0	0	1	2010-09-15	20.4605	23.4539	2.99342
16	2010-12-15	1	34	1	1	1	1	0	0	1	2010-09-15	20.4605	23.4539	2.99342
16	2010-12-28	1	27	1	1	1	1	0	0	1	2010-09-15	20.4605	23.8816	3.42105
16	2010-12-29	0	35	1	1	1	1	0	0	1	2010-09-15	20.4605	23.9145	3.45395
16	2010-12-10	0	36	1	1	1	1	0	0	1	2010-09-15	20.4605	23.2895	2.82895
16	2010-12-30	0	20	1	0	0	0	0	0	1	2010-09-15	20.4605	23.9474	3.48684
17	2010-12-20	0	35	1	0	1	0	0	0	1	2010-10-15	21.4474	23.6184	2.17105
17	2010-12-29	1	40	1	0	1	0	0	0	1	2010-10-15	21.4474	23.9145	2.46711
17	2010-12-30	0	65	1	1	1	1	0	0	1	2010-10-15	21.4474	23.9474	2.5
17	2010-12-10	0	48	1	1	1	1	0	0	1	2010-10-15	21.4474	23.2895	1.84211
17	2010-12-15	0	49	1	0	1	0	0	0	1	2010-10-15	21.4474	23.4539	2.00658
17	2010-12-30	1	22	1	1	1	1	0	0	1	2010-10-15	21.4474	23.9474	2.5
17	2010-12-17	1	30	1	0	1	0	0	0	1	2010-10-15	21.4474	23.5197	2.07237
17	2010-12-20	0	65	1	1	1	1	0	0	1	2010-10-15	21.4474	23.6184	2.17105
17	2010-12-30	0	46	1	0	1	0	0	0	1	2010-10-15	21.4474	23.9474	2.5
17	2010-12-22	0	52	1	0	1	0	0	0	1	2010-10-15	21.4474	23.6842	2.23684
17	2010-12-27	0	17	1	0	1	0	0	0	1	2010-10-15	21.4474	23.8487	2.40132
17	2010-12-17	1	25	1	0	1	0	0	0	1	2010-10-15	21.4474	23.5197	2.07237
17	2010-12-30	1	50	1	1	1	1	0	0	1	2010-10-15	21.4474	23.9474	2.5
17	2010-12-20	1	18	1	1	1	1	0	0	1	2010-10-15	21.4474	23.6184	2.17105
17	2010-12-29	0	70	1	0	1	0	0	0	1	2010-10-15	21.4474	23.9145	2.46711
17	2010-12-08	1	45	1	1	1	1	0	0	1	2010-10-15	21.4474	23.2237	1.77632
17	2010-12-23	1	26	1	0	1	0	0	0	1	2010-10-15	21.4474	23.7171	2.26974
17	2010-12-08	0	42	1	0	1	0	0	0	1	2010-10-15	21.4474	23.2237	1.77632
17	2010-12-01	1	55	1	0	1	0	0	0	1	2010-10-15	21.4474	22.9934	1.54605
17	2010-12-10	1	49	1	0	1	0	0	0	1	2010-10-15	21.4474	23.2895	1.84211
17	2010-12-29	0	35	1	0	1	0	0	0	1	2010-10-15	21.4474	23.9145	2.46711
19	2010-12-27	1	57	1	0	0	0	0	0	1	2010-09-15	20.4605	23.8487	3.38816
19	2010-12-06	0	73	1	1	1	1	0	0	1	2010-09-15	20.4605	23.1579	2.69737
19	2010-12-20	0	17	1	1	1	1	0	0	1	2010-09-15	20.4605	23.6184	3.1579
19	2010-12-08	1	33	1	1	1	1	0	0	1	2010-09-15	20.4605	23.2237	2.76316
19	2010-12-07	1	54	1	1	1	1	0	0	1	2010-09-15	20.4605	23.1908	2.73027
19	2010-12-07	0	36	1	1	1	1	0	0	1	2010-09-15	20.4605	23.1908	2.73027
19	2010-12-29	1	22	1	1	1	1	0	0	1	2010-09-15	20.4605	23.9145	3.45395
19	2010-12-09	0	69	1	1	1	1	0	0	1	2010-09-15	20.4605	23.2566	2.79605
19	2010-12-02	0	39	1	1	1	1	0	0	1	2010-09-15	20.4605	23.0263	2.56579
19	2010-12-01	1	40	1	0	0	0	0	0	1	2010-09-15	20.4605	22.9934	2.5329
19	2010-12-07	0	35	1	0	0	0	0	0	1	2010-09-15	20.4605	23.1908	2.73027
19	2010-12-10	0	37	1	1	1	1	0	0	1	2010-09-15	20.4605	23.2895	2.82895
19	2010-12-01	1	35	1	1	1	1	0	0	1	2010-09-15	20.4605	22.9934	2.5329
19	2010-12-08	1	18	1	0	0	0	0	0	1	2010-09-15	20.4605	23.2237	2.76316
19	2010-12-13	1	17	1	1	1	1	0	0	1	2010-09-15	20.4605	23.3882	2.92763
19	2010-12-14	1	15	1	1	1	1	0	0	1	2010-09-15	20.4605	23.4211	2.96053
19	2010-12-09	1	99	1	1	1	1	0	0	1	2010-09-15	20.4605	23.2566	2.79605
19	2010-12-09	1	32	1	0	0	0	0	0	1	2010-09-15	20.4605	23.2566	2.79605
19	2010-12-14	0	25	1	0	0	0	0	0	1	2010-09-15	20.4605	23.4211	2.96053
19	2010-12-14	0	67	1	1	1	1	0	0	1	2010-09-15	20.4605	23.4211	2.96053
19	2010-12-14	1	70	1	1	1	1	0	0	1	2010-09-15	20.4605	23.4211	2.96053
19	2010-12-07	0	51	1	1	1	1	0	0	1	2010-09-15	20.4605	23.1908	2.73027
19	2010-12-21	1	17	1	1	1	1	0	0	1	2010-09-15	20.4605	23.6513	3.19079
19	2010-12-09	1	32	1	1	1	1	0	0	1	2010-09-15	20.4605	23.2566	2.79605
19	2010-12-09	1	75	1	1	1	1	0	0	1	2010-09-15	20.4605	23.2566	2.79605
19	2010-12-16	1	43	1	1	1	1	0	0	1	2010-09-15	20.4605	23.4868	3.02632
19	2010-12-09	1	82	1	1	1	1	0	0	1	2010-09-15	20.4605	23.2566	2.79605
19	2010-12-20	1	29	1	0	0	0	0	0	1	2010-09-15	20.4605	23.6184	3.1579
19	2010-12-07	1	54	1	0	0	0	0	0	1	2010-09-15	20.4605	23.1908	2.73027
19	2010-12-04	0	68	1	1	1	1	0	0	1	2010-09-15	20.4605	23.0921	2.63158
19	2010-12-17	0	36	1	0	0	0	0	0	1	2010-09-15	20.4605	23.5197	3.05921
19	2010-12-09	0	69	1	0	0	0	0	0	1	2010-09-15	20.4605	23.2566	2.79605
19	2010-12-04	0	58	1	0	0	0	0	0	1	2010-09-15	20.4605	23.0921	2.63158
19	2010-12-09	0	27	1	1	1	1	0	0	1	2010-09-15	20.4605	23.2566	2.79605
20	2010-12-01	0	34	1	1	1	1	0	0	0	2010-12-15	23.4539	22.9934	-0.460525
20	2010-12-21	1	27	1	0	0	0	0	0	1	2010-12-15	23.4539	23.6513	0.197369
20	2010-12-08	1	67	1	0	0	0	0	0	0	2010-12-15	23.4539	23.2237	-0.230263
20	2010-12-31	0	49	1	1	1	1	1	1	1	2010-12-15	23.4539	23.9803	0.526316
20	2010-12-15	1	20	1	0	0	0	0	0	0	2010-12-15	23.4539	23.4539	0
20	2010-12-09	0	63	1	1	1	1	0	0	0	2010-12-15	23.4539	23.2566	-0.197369
20	2010-12-30	1	40	1	1	1	1	0	0	1	2010-12-15	23.4539	23.9474	0.493422
11	2011-01-13	1	43	1	1	1	1	0	0	1	2010-08-15	19.4408	24.4079	4.9671
11	2011-01-05	1	44	1	1	1	1	0	0	1	2010-08-15	19.4408	24.1447	4.70395
11	2011-01-17	1	50	1	1	1	1	0	0	1	2010-08-15	19.4408	24.5395	5.09868
11	2011-01-13	0	64	1	1	1	1	0	0	1	2010-08-15	19.4408	24.4079	4.9671
11	2011-01-04	1	43	1	1	1	1	0	0	1	2010-08-15	19.4408	24.1118	4.67105
11	2011-01-03	1	22	1	1	1	1	0	0	1	2010-08-15	19.4408	24.0789	4.63816
11	2011-01-05	0	39	1	1	1	1	0	0	1	2010-08-15	19.4408	24.1447	4.70395
11	2011-01-17	1	62	1	1	1	1	0	0	1	2010-08-15	19.4408	24.5395	5.09868
11	2011-01-28	1	36	1	1	1	1	0	0	1	2010-08-15	19.4408	24.9013	5.46053
11	2011-01-05	1	50	1	1	1	1	0	0	1	2010-08-15	19.4408	24.1447	4.70395
11	2011-01-04	0	24	1	1	1	1	0	0	1	2010-08-15	19.4408	24.1118	4.67105
11	2011-01-07	1	25	1	1	1	1	0	0	1	2010-08-15	19.4408	24.2105	4.76973
11	2011-01-06	1	39	1	1	1	1	0	0	1	2010-08-15	19.4408	24.1776	4.73684
11	2011-01-17	0	70	1	1	1	1	0	0	1	2010-08-15	19.4408	24.5395	5.09868
11	2011-01-04	0	42	1	1	1	1	0	0	1	2010-08-15	19.4408	24.1118	4.67105
11	2011-01-10	1	39	1	1	1	1	0	0	1	2010-08-15	19.4408	24.3092	4.86842
15	2011-01-04	1	79	1	1	1	1	1	1	1	2010-08-15	19.4408	24.1118	4.67105
15	2011-01-19	0	53	1	1	1	1	0	0	1	2010-08-15	19.4408	24.6053	5.16447
15	2011-01-17	1	26	1	1	1	1	0	0	1	2010-08-15	19.4408	24.5395	5.09868
15	2011-01-17	0	37	1	1	1	1	0	0	1	2010-08-15	19.4408	24.5395	5.09868
15	2011-01-10	0	60	1	1	1	1	0	0	1	2010-08-15	19.4408	24.3092	4.86842
15	2011-01-26	0	52	1	1	1	1	0	0	1	2010-08-15	19.4408	24.8355	5.39473
15	2011-01-11	0	38	1	1	1	1	0	0	1	2010-08-15	19.4408	24.3421	4.90132
16	2011-01-15	1	21	1	1	1	1	0	0	1	2010-09-15	20.4605	24.4737	4.01316
16	2011-01-12	0	22	1	1	1	1	0	0	1	2010-09-15	20.4605	24.375	3.91447
16	2011-01-13	0	38	1	1	1	1	1	1	1	2010-09-15	20.4605	24.4079	3.94737
16	2011-01-11	1	30	1	1	1	1	0	0	1	2010-09-15	20.4605	24.3421	3.88158
16	2011-01-17	0	29	1	1	1	1	0	0	1	2010-09-15	20.4605	24.5395	4.07895
16	2011-01-27	1	30	1	1	1	1	0	0	1	2010-09-15	20.4605	24.8684	4.4079
16	2011-01-28	0	63	1	1	1	1	0	0	1	2010-09-15	20.4605	24.9013	4.44079
16	2011-01-17	1	17	1	1	1	1	0	0	1	2010-09-15	20.4605	24.5395	4.07895
16	2011-01-05	0	15	1	1	1	1	0	0	1	2010-09-15	20.4605	24.1447	3.68421
16	2011-01-14	0	31	1	1	1	1	0	0	1	2010-09-15	20.4605	24.4408	3.98027
16	2011-01-18	0	33	1	1	1	1	0	0	1	2010-09-15	20.4605	24.5724	4.11184
16	2011-01-06	0	30	1	1	1	1	0	0	1	2010-09-15	20.4605	24.1776	3.71711
16	2011-01-19	1	31	1	1	1	1	0	0	1	2010-09-15	20.4605	24.6053	4.14474
16	2011-01-12	1	22	1	1	1	1	0	0	1	2010-09-15	20.4605	24.375	3.91447
16	2011-01-21	1	50	1	1	1	1	0	0	1	2010-09-15	20.4605	24.6711	4.21053
16	2011-01-12	0	25	1	1	1	1	0	0	1	2010-09-15	20.4605	24.375	3.91447
16	2011-01-25	0	16	1	1	1	1	0	0	1	2010-09-15	20.4605	24.8026	4.34211
17	2011-01-10	1	19	1	1	1	1	0	0	1	2010-10-15	21.4474	24.3092	2.86184
17	2011-01-25	0	26	1	1	1	1	0	0	1	2010-10-15	21.4474	24.8026	3.35526
17	2011-01-11	1	24	1	1	1	1	0	0	1	2010-10-15	21.4474	24.3421	2.89474
17	2011-01-10	0	50	1	1	1	1	0	0	1	2010-10-15	21.4474	24.3092	2.86184
17	2011-01-25	1	40	1	1	1	1	0	0	1	2010-10-15	21.4474	24.8026	3.35526
17	2011-01-20	0	25	1	1	1	1	1	1	1	2010-10-15	21.4474	24.6382	3.19079
17	2011-01-28	0	86	1	1	1	1	0	0	1	2010-10-15	21.4474	24.9013	3.45395
17	2011-01-24	1	23	1	0	0	0	0	0	1	2010-10-15	21.4474	24.7697	3.32237
17	2011-01-19	1	50	1	1	1	1	0	0	1	2010-10-15	21.4474	24.6053	3.15789
17	2011-01-07	1	30	1	1	1	1	0	0	1	2010-10-15	21.4474	24.2105	2.76316
17	2011-01-20	0	59	1	1	1	1	0	0	1	2010-10-15	21.4474	24.6382	3.19079
17	2011-01-07	1	18	1	1	1	1	0	0	1	2010-10-15	21.4474	24.2105	2.76316
17	2011-01-20	0	20	1	1	1	1	0	0	1	2010-10-15	21.4474	24.6382	3.19079
17	2011-01-18	1	58	1	1	1	1	0	0	1	2010-10-15	21.4474	24.5724	3.125
17	2011-01-12	0	80	1	1	1	1	0	0	1	2010-10-15	21.4474	24.375	2.92763
19	2011-01-17	0	32	1	0	0	0	0	0	1	2010-09-15	20.4605	24.5395	4.07895
19	2011-01-10	1	60	1	0	0	0	0	0	1	2010-09-15	20.4605	24.3092	3.84868
19	2011-01-18	1	54	1	0	0	0	0	0	1	2010-09-15	20.4605	24.5724	4.11184
19	2011-01-17	0	86	1	0	0	0	0	0	1	2010-09-15	20.4605	24.5395	4.07895
19	2011-01-06	0	62	1	0	0	0	0	0	1	2010-09-15	20.4605	24.1776	3.71711
19	2011-01-06	1	35	1	0	0	0	0	0	1	2010-09-15	20.4605	24.1776	3.71711
19	2011-01-01	1	40	1	0	0	0	0	0	1	2010-09-15	20.4605	24.0132	3.55263
19	2011-01-18	0	46	1	0	0	0	0	0	1	2010-09-15	20.4605	24.5724	4.11184
19	2011-01-19	0	30	1	0	0	0	0	0	1	2010-09-15	20.4605	24.6053	4.14474
19	2011-01-19	1	32	1	0	0	0	0	0	1	2010-09-15	20.4605	24.6053	4.14474
19	2011-01-26	1	56	1	0	0	0	0	0	1	2010-09-15	20.4605	24.8355	4.375
19	2011-01-10	1	17	1	0	0	0	0	0	1	2010-09-15	20.4605	24.3092	3.84868
20	2011-01-20	1	39	1	1	1	1	0	0	1	2010-12-15	23.4539	24.6382	1.18421
20	2011-01-19	0	20	1	0	0	0	0	0	1	2010-12-15	23.4539	24.6053	1.15132
20	2011-01-28	1	30	1	1	1	1	0	0	1	2010-12-15	23.4539	24.9013	1.44737
20	2011-01-13	0	37	1	1	1	1	0	0	1	2010-12-15	23.4539	24.4079	0.953947
20	2011-01-28	1	15	1	1	1	1	0	0	1	2010-12-15	23.4539	24.9013	1.44737
20	2011-01-17	0	30	1	1	1	1	1	1	1	2010-12-15	23.4539	24.5395	1.08553
20	2011-01-03	1	19	1	0	0	0	0	0	1	2010-12-15	23.4539	24.0789	0.625
20	2011-01-28	1	43	1	0	0	0	1	0	1	2010-12-15	23.4539	24.9013	1.44737
20	2011-01-10	1	40	1	1	1	1	0	0	1	2010-12-15	23.4539	24.3092	0.855263
20	2011-01-28	1	33	1	0	0	0	0	0	1	2010-12-15	23.4539	24.9013	1.44737
20	2011-01-21	0	20	1	0	0	0	0	0	1	2010-12-15	23.4539	24.6711	1.21711
20	2011-01-20	1	33	1	1	1	1	1	1	1	2010-12-15	23.4539	24.6382	1.18421
20	2011-01-10	1	30	1	1	1	1	0	0	1	2010-12-15	23.4539	24.3092	0.855263
20	2011-01-08	1	30	1	0	0	0	0	0	1	2010-12-15	23.4539	24.2434	0.789474
11	2011-02-07	1	20	1	1	1	1	1	1	1	2010-08-15	19.4408	25.2303	5.78947
11	2011-02-09	0	50	1	0	1	0	0	0	1	2010-08-15	19.4408	25.2961	5.85526
11	2011-02-07	0	45	1	1	1	1	1	1	1	2010-08-15	19.4408	25.2303	5.78947
11	2011-02-02	0	30	1	0	1	0	0	0	1	2010-08-15	19.4408	25.0658	5.625
11	2011-02-09	1	15	1	1	1	1	0	0	1	2010-08-15	19.4408	25.2961	5.85526
11	2011-02-07	0	30	1	1	1	1	0	0	1	2010-08-15	19.4408	25.2303	5.78947
11	2011-02-07	0	34	1	1	1	1	0	0	1	2010-08-15	19.4408	25.2303	5.78947
15	2011-02-07	1	32	1	1	1	1	0	0	1	2010-08-15	19.4408	25.2303	5.78947
15	2011-02-07	1	32	1	1	1	1	0	0	1	2010-08-15	19.4408	25.2303	5.78947
15	2011-02-07	0	46	1	1	1	1	0	0	1	2010-08-15	19.4408	25.2303	5.78947
15	2011-02-07	0	22	1	1	1	1	1	1	1	2010-08-15	19.4408	25.2303	5.78947
15	2011-02-03	0	60	1	1	1	1	0	0	1	2010-08-15	19.4408	25.0987	5.65789
15	2011-02-02	1	21	1	0	1	0	0	0	1	2010-08-15	19.4408	25.0658	5.625
15	2011-02-07	1	45	1	1	1	1	0	0	1	2010-08-15	19.4408	25.2303	5.78947
15	2011-02-08	1	85	1	0	0	0	0	0	1	2010-08-15	19.4408	25.2632	5.82237
15	2011-02-09	1	25	1	1	1	1	0	0	1	2010-08-15	19.4408	25.2961	5.85526
15	2011-02-07	0	86	1	1	1	1	0	0	1	2010-08-15	19.4408	25.2303	5.78947
15	2011-02-11	0	45	1	1	1	1	0	0	1	2010-08-15	19.4408	25.3618	5.92105
16	2011-02-10	0	46	1	0	1	0	0	0	1	2010-09-15	20.4605	25.3289	4.86842
16	2011-02-07	0	25	1	0	1	0	0	0	1	2010-09-15	20.4605	25.2303	4.76974
16	2011-02-10	1	60	1	1	1	1	0	0	1	2010-09-15	20.4605	25.3289	4.86842
16	2011-02-15	1	74	1	1	1	1	0	0	1	2010-09-15	20.4605	25.4934	5.0329
16	2011-02-01	0	63	1	1	1	1	0	0	1	2010-09-15	20.4605	25.0329	4.57237
16	2011-02-01	0	80	1	1	1	1	0	0	1	2010-09-15	20.4605	25.0329	4.57237
16	2011-02-16	1	33	1	1	1	1	0	0	1	2010-09-15	20.4605	25.5263	5.06579
16	2011-02-07	0	39	1	0	1	0	0	0	1	2010-09-15	20.4605	25.2303	4.76974
16	2011-02-04	1	19	1	1	1	1	1	1	1	2010-09-15	20.4605	25.1316	4.67105
16	2011-02-10	1	55	1	1	1	1	0	0	1	2010-09-15	20.4605	25.3289	4.86842
16	2011-02-10	0	50	1	1	1	1	0	0	1	2010-09-15	20.4605	25.3289	4.86842
16	2011-02-08	0	55	1	1	1	1	1	1	1	2010-09-15	20.4605	25.2632	4.80263
16	2011-02-02	0	40	1	1	1	1	0	0	1	2010-09-15	20.4605	25.0658	4.60527
16	2011-02-10	1	29	1	1	1	1	0	0	1	2010-09-15	20.4605	25.3289	4.86842
16	2011-02-28	1	45	1	0	1	0	0	0	1	2010-09-15	20.4605	25.9211	5.46053
16	2011-02-08	1	56	1	1	1	1	0	0	1	2010-09-15	20.4605	25.2632	4.80263
17	2011-02-25	0	40	1	1	1	1	0	0	1	2010-10-15	21.4474	25.8224	4.375
17	2011-02-28	0	50	1	1	1	1	1	1	1	2010-10-15	21.4474	25.9211	4.47368
17	2011-02-09	1	70	1	1	1	1	0	0	1	2010-10-15	21.4474	25.2961	3.84868
17	2011-02-21	1	20	1	0	1	0	0	0	1	2010-10-15	21.4474	25.6908	4.24342
17	2011-02-10	1	90	1	0	0	0	0	0	1	2010-10-15	21.4474	25.3289	3.88158
17	2011-02-15	0	41	1	1	1	1	1	1	1	2010-10-15	21.4474	25.4934	4.04605
17	2011-02-22	1	29	1	0	1	0	0	0	1	2010-10-15	21.4474	25.7237	4.27632
17	2011-02-25	1	29	1	1	1	1	1	1	1	2010-10-15	21.4474	25.8224	4.375
17	2011-02-22	1	36	1	0	1	0	0	0	1	2010-10-15	21.4474	25.7237	4.27632
17	2011-02-03	0	70	1	1	1	1	0	0	1	2010-10-15	21.4474	25.0987	3.65132
17	2011-02-02	1	45	1	0	0	0	0	0	1	2010-10-15	21.4474	25.0658	3.61842
17	2011-02-21	1	30	1	0	1	0	0	0	1	2010-10-15	21.4474	25.6908	4.24342
17	2011-02-04	0	37	1	0	1	0	0	0	1	2010-10-15	21.4474	25.1316	3.68421
17	2011-02-21	1	23	1	0	0	0	0	0	1	2010-10-15	21.4474	25.6908	4.24342
17	2011-02-11	1	50	1	1	1	1	0	0	1	2010-10-15	21.4474	25.3618	3.91447
17	2011-02-11	0	56	1	1	1	1	0	0	1	2010-10-15	21.4474	25.3618	3.91447
17	2011-02-04	0	80	1	1	1	1	0	0	1	2010-10-15	21.4474	25.1316	3.68421
17	2011-02-04	0	44	1	0	1	0	0	0	1	2010-10-15	21.4474	25.1316	3.68421
17	2011-02-10	0	45	1	1	1	1	0	0	1	2010-10-15	21.4474	25.3289	3.88158
17	2011-02-14	0	41	1	1	1	1	0	0	1	2010-10-15	21.4474	25.4605	4.01316
17	2011-02-14	1	45	1	1	1	1	0	0	1	2010-10-15	21.4474	25.4605	4.01316
17	2011-02-08	0	38	1	0	0	0	1	0	1	2010-10-15	21.4474	25.2632	3.81579
17	2011-02-28	0	35	1	1	1	1	0	0	1	2010-10-15	21.4474	25.9211	4.47368
17	2011-02-16	0	30	1	1	1	1	0	0	1	2010-10-15	21.4474	25.5263	4.07895
17	2011-02-11	0	39	1	1	1	1	0	0	1	2010-10-15	21.4474	25.3618	3.91447
17	2011-02-14	1	29	1	0	1	0	0	0	1	2010-10-15	21.4474	25.4605	4.01316
17	2011-02-15	1	21	1	1	1	1	0	0	1	2010-10-15	21.4474	25.4934	4.04605
19	2011-02-14	0	23	1	1	1	1	0	0	1	2010-09-15	20.4605	25.4605	5
19	2011-02-16	1	60	1	0	1	0	0	0	1	2010-09-15	20.4605	25.5263	5.06579
19	2011-02-16	1	23	1	0	0	0	0	0	1	2010-09-15	20.4605	25.5263	5.06579
19	2011-02-22	0	37	1	1	1	1	1	1	1	2010-09-15	20.4605	25.7237	5.26316
19	2011-02-16	0	30	1	0	1	0	0	0	1	2010-09-15	20.4605	25.5263	5.06579
19	2011-02-07	0	43	1	1	1	1	0	0	1	2010-09-15	20.4605	25.2303	4.76974
19	2011-02-28	0	31	1	1	1	1	0	0	1	2010-09-15	20.4605	25.9211	5.46053
19	2011-02-07	0	46	1	1	1	1	0	0	1	2010-09-15	20.4605	25.2303	4.76974
19	2011-02-17	1	52	1	1	1	1	0	0	1	2010-09-15	20.4605	25.5592	5.09868
19	2011-02-01	1	40	1	0	0	0	0	0	1	2010-09-15	20.4605	25.0329	4.57237
19	2011-02-07	0	26	1	1	1	1	0	0	1	2010-09-15	20.4605	25.2303	4.76974
19	2011-02-10	1	50	1	0	1	0	0	0	1	2010-09-15	20.4605	25.3289	4.86842
19	2011-02-03	0	52	1	0	0	0	0	0	1	2010-09-15	20.4605	25.0987	4.63816
19	2011-02-24	0	73	1	0	1	0	0	0	1	2010-09-15	20.4605	25.7895	5.32895
19	2011-02-08	0	45	1	0	0	0	0	0	1	2010-09-15	20.4605	25.2632	4.80263
19	2011-02-10	0	27	1	0	1	0	0	0	1	2010-09-15	20.4605	25.3289	4.86842
19	2011-02-16	0	27	1	1	1	1	0	0	1	2010-09-15	20.4605	25.5263	5.06579
20	2011-02-28	0	24	1	0	0	0	0	0	1	2010-12-15	23.4539	25.9211	2.46711
20	2011-02-03	1	65	1	0	0	0	0	0	1	2010-12-15	23.4539	25.0987	1.64474
20	2011-02-07	1	21	1	0	1	0	0	0	1	2010-12-15	23.4539	25.2303	1.77632
20	2011-02-07	1	24	1	0	0	0	1	0	1	2010-12-15	23.4539	25.2303	1.77632
20	2011-02-01	0	33	1	1	1	1	1	1	1	2010-12-15	23.4539	25.0329	1.57895
16	2011-03-01	0	50	1	1	1	1	1	1	1	2010-09-15	20.4605	25.9539	5.49342
16	2011-03-16	1	38	1	1	1	1	0	0	1	2010-09-15	20.4605	26.4474	5.98684
16	2011-03-01	0	20	1	1	1	1	0	0	1	2010-09-15	20.4605	25.9539	5.49342
16	2011-03-15	0	60	1	1	1	1	0	0	1	2010-09-15	20.4605	26.4145	5.95395
16	2011-03-01	0	34	1	1	1	1	0	0	1	2010-09-15	20.4605	25.9539	5.49342
16	2011-03-03	0	46	1	1	1	1	1	1	1	2010-09-15	20.4605	26.0197	5.55921
16	2011-03-09	1	58	1	1	1	1	0	0	1	2010-09-15	20.4605	26.2171	5.75658
16	2011-03-09	1	50	1	1	1	1	0	0	1	2010-09-15	20.4605	26.2171	5.75658
16	2011-03-10	0	40	1	1	1	1	1	1	1	2010-09-15	20.4605	26.25	5.78947
16	2011-03-03	0	32	1	1	1	1	1	1	1	2010-09-15	20.4605	26.0197	5.55921
16	2011-03-07	0	64	1	1	1	1	0	0	1	2010-09-15	20.4605	26.1513	5.69079
16	2011-03-03	1	45	1	1	1	1	0	0	1	2010-09-15	20.4605	26.0197	5.55921
16	2011-03-03	1	29	1	0	1	0	0	0	1	2010-09-15	20.4605	26.0197	5.55921
16	2011-03-10	0	67	1	1	1	1	0	0	1	2010-09-15	20.4605	26.25	5.78947
16	2011-03-16	1	37	1	1	1	1	0	0	1	2010-09-15	20.4605	26.4474	5.98684
16	2011-03-04	1	23	1	1	1	1	0	0	1	2010-09-15	20.4605	26.0526	5.59211
17	2011-03-28	0	59	1	1	1	1	0	0	1	2010-10-15	21.4474	26.8421	5.39474
17	2011-03-16	0	30	1	1	1	1	1	1	1	2010-10-15	21.4474	26.4474	5
17	2011-03-15	1	28	1	0	1	0	0	0	1	2010-10-15	21.4474	26.4145	4.96711
17	2011-03-17	0	55	1	0	0	0	0	0	1	2010-10-15	21.4474	26.4803	5.03289
17	2011-03-14	1	48	1	1	1	1	0	0	1	2010-10-15	21.4474	26.3816	4.93421
17	2011-03-28	1	52	1	1	1	1	0	0	1	2010-10-15	21.4474	26.8421	5.39474
17	2011-03-10	1	20	1	1	1	1	0	0	1	2010-10-15	21.4474	26.25	4.80263
17	2011-03-10	1	30	1	1	1	1	0	0	1	2010-10-15	21.4474	26.25	4.80263
17	2011-03-25	1	68	1	0	1	0	0	0	1	2010-10-15	21.4474	26.7434	5.29605
17	2011-03-14	1	28	1	0	1	0	0	0	1	2010-10-15	21.4474	26.3816	4.93421
17	2011-03-15	0	17	1	1	1	1	0	0	1	2010-10-15	21.4474	26.4145	4.96711
17	2011-03-14	1	21	1	0	1	0	0	0	1	2010-10-15	21.4474	26.3816	4.93421
17	2011-03-14	1	24	1	0	1	0	0	0	1	2010-10-15	21.4474	26.3816	4.93421
17	2011-03-28	1	16	1	1	1	1	0	0	1	2010-10-15	21.4474	26.8421	5.39474
17	2011-03-17	1	55	1	0	1	0	0	0	1	2010-10-15	21.4474	26.4803	5.03289
17	2011-03-18	0	52	1	1	1	1	1	1	1	2010-10-15	21.4474	26.5132	5.06579
17	2011-03-25	1	30	1	0	1	0	0	0	1	2010-10-15	21.4474	26.7434	5.29605
17	2011-03-11	0	48	1	1	1	1	0	0	1	2010-10-15	21.4474	26.2829	4.83553
17	2011-03-09	0	42	1	1	1	1	0	0	1	2010-10-15	21.4474	26.2171	4.76974
17	2011-03-21	0	49	1	1	1	1	0	0	1	2010-10-15	21.4474	26.6118	5.16447
17	2011-03-10	1	15	1	1	1	1	0	0	1	2010-10-15	21.4474	26.25	4.80263
17	2011-03-09	0	48	1	1	1	1	1	1	1	2010-10-15	21.4474	26.2171	4.76974
17	2011-03-29	1	52	1	1	1	1	0	0	1	2010-10-15	21.4474	26.875	5.42763
17	2011-03-10	1	35	1	1	1	1	0	0	1	2010-10-15	21.4474	26.25	4.80263
17	2011-03-24	1	37	1	0	1	0	0	0	1	2010-10-15	21.4474	26.7105	5.26316
17	2011-03-09	1	20	1	1	1	1	0	0	1	2010-10-15	21.4474	26.2171	4.76974
17	2011-03-18	1	15	1	0	1	0	0	0	1	2010-10-15	21.4474	26.5132	5.06579
19	2011-03-13	1	35	1	0	0	0	0	0	1	2010-09-15	20.4605	26.3487	5.88816
19	2011-03-13	0	70	1	0	1	0	0	0	1	2010-09-15	20.4605	26.3487	5.88816
19	2011-03-10	0	80	1	0	0	0	0	0	1	2010-09-15	20.4605	26.25	5.78947
19	2011-03-10	1	32	1	0	0	0	0	0	1	2010-09-15	20.4605	26.25	5.78947
19	2011-03-14	1	24	1	0	0	0	0	0	1	2010-09-15	20.4605	26.3816	5.92105
19	2011-03-09	0	55	1	0	0	0	0	0	1	2010-09-15	20.4605	26.2171	5.75658
19	2011-03-15	0	80	1	0	1	0	0	0	1	2010-09-15	20.4605	26.4145	5.95395
19	2011-03-13	0	41	1	1	1	1	0	0	1	2010-09-15	20.4605	26.3487	5.88816
19	2011-03-07	1	20	1	0	0	0	0	0	1	2010-09-15	20.4605	26.1513	5.69079
19	2011-03-14	1	30	1	1	1	1	0	0	1	2010-09-15	20.4605	26.3816	5.92105
19	2011-03-10	1	30	1	0	0	0	0	0	1	2010-09-15	20.4605	26.25	5.78947
19	2011-03-10	1	23	1	0	1	0	0	0	1	2010-09-15	20.4605	26.25	5.78947
20	2011-03-24	0	31	1	0	0	0	0	0	1	2010-12-15	23.4539	26.7105	3.25658
20	2011-03-24	0	27	1	0	0	0	0	0	1	2010-12-15	23.4539	26.7105	3.25658
20	2011-03-26	1	19	1	0	0	0	0	0	1	2010-12-15	23.4539	26.7763	3.32237
20	2011-03-10	0	60	1	1	1	1	1	1	1	2010-12-15	23.4539	26.25	2.79605
20	2011-03-21	1	35	1	0	0	0	1	0	1	2010-12-15	23.4539	26.6118	3.15789
20	2011-03-30	0	28	1	1	1	1	1	1	1	2010-12-15	23.4539	26.9079	3.45395
17	2011-04-11	0	52	1	1	1	1	1	1	1	2010-10-15	21.4474	27.3026	5.85526
17	2011-04-11	1	74	1	1	1	1	0	0	1	2010-10-15	21.4474	27.3026	5.85526
17	2011-04-11	0	59	1	1	1	1	0	0	1	2010-10-15	21.4474	27.3026	5.85526
17	2011-04-07	1	60	1	0	1	0	0	0	1	2010-10-15	21.4474	27.1711	5.72368
17	2011-04-05	0	25	1	1	1	1	0	0	1	2010-10-15	21.4474	27.1053	5.65789
17	2011-04-05	0	46	1	1	1	1	1	1	1	2010-10-15	21.4474	27.1053	5.65789
17	2011-04-11	1	32	1	1	1	1	0	0	1	2010-10-15	21.4474	27.3026	5.85526
17	2011-04-07	0	36	1	1	1	1	0	0	1	2010-10-15	21.4474	27.1711	5.72368
17	2011-04-12	1	38	1	1	1	1	0	0	1	2010-10-15	21.4474	27.3355	5.88816
17	2011-04-13	0	68	1	1	1	1	0	0	1	2010-10-15	21.4474	27.3684	5.92105
17	2011-04-08	1	40	1	0	1	0	0	0	1	2010-10-15	21.4474	27.2039	5.75658
17	2011-04-05	0	49	1	0	0	0	0	0	1	2010-10-15	21.4474	27.1053	5.65789
17	2011-04-06	1	24	1	1	1	1	0	0	1	2010-10-15	21.4474	27.1382	5.69079
17	2011-04-15	1	60	1	0	1	0	0	0	1	2010-10-15	21.4474	27.4342	5.98684
17	2011-04-01	1	52	1	1	1	1	0	0	1	2010-10-15	21.4474	26.9737	5.52632
17	2011-04-11	1	50	1	1	1	1	0	0	1	2010-10-15	21.4474	27.3026	5.85526
17	2011-04-12	0	17	1	0	1	0	0	0	1	2010-10-15	21.4474	27.3355	5.88816
20	2011-04-08	1	25	1	1	1	1	0	0	1	2010-12-15	23.4539	27.2039	3.75
20	2011-04-21	1	17	1	0	0	0	0	0	1	2010-12-15	23.4539	27.6316	4.17763
20	2011-04-04	1	31	1	0	0	0	0	0	1	2010-12-15	23.4539	27.0724	3.61842
20	2011-04-30	0	25	1	0	0	0	0	0	1	2010-12-15	23.4539	27.9276	4.47368
20	2011-04-26	1	59	1	0	0	0	0	0	1	2010-12-15	23.4539	27.7961	4.34211
20	2011-05-09	1	25	1	0	0	0	0	0	1	2010-12-15	23.4539	28.2237	4.76974
20	2011-05-24	1	24	1	0	0	0	0	0	1	2010-12-15	23.4539	28.7171	5.26316
20	2011-05-16	1	40	1	0	0	0	0	0	1	2010-12-15	23.4539	28.4539	5
20	2011-05-25	1	52	1	0	0	0	0	0	1	2010-12-15	23.4539	28.75	5.29605
20	2011-05-26	0	60	1	0	0	0	0	0	1	2010-12-15	23.4539	28.7829	5.32895
20	2011-05-20	1	40	1	1	1	1	0	0	1	2010-12-15	23.4539	28.5855	5.13158
20	2011-05-30	1	78	1	1	1	1	0	0	1	2010-12-15	23.4539	28.9145	5.46053
20	2011-05-30	0	27	1	1	1	1	0	0	1	2010-12-15	23.4539	28.9145	5.46053
20	2011-05-06	1	49	1	1	1	1	0	0	1	2010-12-15	23.4539	28.125	4.67105
20	2011-05-30	0	46	1	1	1	1	0	0	1	2010-12-15	23.4539	28.9145	5.46053
20	2011-05-30	0	60	1	1	1	1	0	0	1	2010-12-15	23.4539	28.9145	5.46053
20	2011-05-09	1	30	1	0	0	0	0	0	1	2010-12-15	23.4539	28.2237	4.76974
20	2011-05-13	0	48	1	0	1	1	0	1	1	2010-12-15	23.4539	28.3553	4.90132
20	2011-05-30	0	15	1	1	1	1	0	0	1	2010-12-15	23.4539	28.9145	5.46053
20	2011-05-30	1	23	1	1	1	1	0	0	1	2010-12-15	23.4539	28.9145	5.46053
20	2011-06-06	1	78	1	0	0	0	0	0	1	2010-12-15	23.4539	29.1447	5.69079
20	2011-06-13	1	29	1	0	0	0	0	0	1	2010-12-15	23.4539	29.375	5.92105
20	2011-06-04	0	38	1	0	0	0	0	0	1	2010-12-15	23.4539	29.0789	5.625
20	2011-06-07	0	22	1	1	1	1	0	0	1	2010-12-15	23.4539	29.1776	5.72368
20	2011-06-14	1	21	1	0	1	0	0	0	1	2010-12-15	23.4539	29.4079	5.95395
20	2011-06-06	0	18	1	0	0	0	0	0	1	2010-12-15	23.4539	29.1447	5.69079

## Sheet: Data dictionary
Variable	Description
siteid	Study site
date	Date of patient visit
age	Age
coughhistory	Cough >=2 weeks
summary	ISTC adherent? (0=no, 1=yes)
tbexamordered	TB exam ordered? (0=no, 1=yes)
tbexamcompl	TB exam completed? (0=no, 1=yes)
newtbrx	TB treatment started? (0=no, 1=yes)
afbpos	AFB positive? (0=no, 1=yes)
post	Pre/Post intervention (0=pre, 1=post)
startdt	Date training started
startmonth	Month training started
month	Patient visit month
cm	Centered month
